# Supplementary material
Source: PubMed Central journal article supplement (PMC5540194)
Supplement: NIHMS73132-supplement-1.pdf [file NIHMS73132-supplement-1.pdf]

# Supplementary Information: Mechanical strain-sensing implicated in cell shape recovery in *Escherichia coli*

Felix Wong<sup>1,†</sup>, Lars D. Renner<sup>2,3,†,\*</sup>, Gizem Özbaykal<sup>4</sup>, Jayson Paulose<sup>5</sup>, Douglas B. Weibel<sup>3,6</sup>, Sven van Teeffelen<sup>4</sup>, and Ariel Amir<sup>1,\*</sup>

<sup>1</sup>School of Engineering and Applied Sciences, Harvard University, Cambridge, MA 02138, USA

<sup>2</sup>Leibniz Institute of Polymer Research and the Max Bergmann Center of Biomaterials, 01069 Dresden, Germany

<sup>3</sup>Department of Biochemistry, University of Wisconsin-Madison, Madison, WI 53706, USA

<sup>4</sup>Department of Microbiology, Institut Pasteur, 75724 Paris, France

<sup>5</sup>Instituut-Lorentz for Theoretical Physics, Leiden University, Leiden, The Netherlands

<sup>6</sup>Department of Biomedical Engineering, University of Wisconsin-Madison, Madison, WI 53706, USA

<sup>†</sup>These authors contributed equally to this work.

\*Corresponding authors: Lars D. Renner ([renner@ipfdd.de](mailto:renner@ipfdd.de)), Ariel Amir ([arielamir@seas.harvard.edu](mailto:arielamir@seas.harvard.edu))

## Supplementary Note 1

We desire to quantify the residual stresses due to anisotropic, differential growth in the *E. coli* cell wall, ignoring its hemispherical endcaps. It is convenient to use the language of differential geometry in modeling differential growth. In general, geometric information about a surface, a subset of  $\mathbb{R}^3$  whose coordinates  $\vec{r}_i$  are functions of two independent parameters, can be encoded in a metric, a quantity which relates small increments in parameter space to the lengths of corresponding steps on the surface. The covariant metric tensor associated with any surface parameterization  $\vec{r}(x_1, x_2)$  is  $g_{ij} = \vec{m}_i \cdot \vec{m}_j$ , where  $\vec{m}_i = \partial \vec{r} / \partial x_i$ . A cylinder of radius  $r$  and length  $L$ , for instance, is parametrized in cylindrical coordinates ( $x \in [0, L], \theta \in [0, 2\pi]$ ) as  $\vec{r} = (x, r \sin \theta, r \cos \theta)$  and described by the metric tensor

$$(g_{ij}) = \begin{pmatrix} 1 & 0 \\ 0 & r^2 \end{pmatrix}. \quad (\text{S1})$$

The cylinder is not the only shape that possesses this metric: there can be many embeddings of this metric in  $\mathbb{R}^3$ . By Gauss's theorem egregium, any isometric embedding preserves the Gaussian curvature of the cylindrical metric and does not cause any elastic stretching of the two-dimensional material (but may be penalized by other factors, or extrinsic properties, that depend on the embedding and not the metric). An example of an extrinsic property is the mean curvature. The free energy of an elastic shell generally contains contributions due to both an in-plane stretching energy and a curvature energy which quadratically penalizes changes in mean curvature from the initial conformation. For extremely thin shells like the *E. coli* cell wall, the curvature energy is negligible compared to the stretching energy. Hence, it is valid to ignore the curvature energy and model the *E. coli* cell wall as an elastic membrane. Another extrinsic property which can change the embedding of the shell is an internal pressure, which is relevant to *E. coli* and will be discussed below.

**Differential growth of the bacterial cell wall.** We model the cell wall as an isotropic, homogeneous, linear-elastic membrane which is plastically deformed due to growth [1, 2]. There is evidence for cell wall growth occurring through circumferential insertions of glycan strands that are then crosslinked to their neighboring strands [3, 4, 5]. The insertion of glycan strands in the circumferential direction can be coupled to the mechanical strains and other elastic quantities of the cell wall, which may not assume a uniform profile. Generally, growth can be described as a flow on the metric [6, 7]: after sustained growth, the *target metric*  $g^t$  may be different from the *initial metric*  $g^b$ . The components of the target metric, which describes the intrinsic geometry of the cell after growth, can be arbitrary functions of the surface coordinates  $x_1$  and  $x_2$ :  $g_{ij}^t = g_{ij}^t(x_1, x_2)$ . The energetic penalty for deviating from this metric is the in-plane stretching energy

$$E_{\text{stretch}} = \frac{1}{2} \int u_{ij} \sigma_{ij} dx_1 dx_2, \quad (\text{S2})$$

where  $u_{ij} = U_i^j$  are the mixed (covariant and contravariant) forms of the strain tensor  $U = \frac{1}{2}(g - g^t)$ ,  $\sigma_{ij}$  are the associated stress resultants, and  $g$  is the metric of the actual embedding (which may differ from  $g^b$ ). Here, index lowering and raising are defined with respect to  $g^t$ . In the absence of extrinsic properties such as pressure, the realized embedding is simply the one which minimizes  $E_{\text{stretch}}$ . However, an internal pressure results in an additional pressure-volume term in the total energy

$$\mathcal{H} = -pV + E_{\text{stretch}}, \quad (\text{S3})$$

and may thus change the equilibrium embedding. Finding the equilibrium embedding for *E. coli* then becomes a more delicate problem, and we address this numerically below.

Generally, upon realizing the equilibrium embedding, a cell's shape may not be cylindrical. Determining the embedding may therefore yield information about past growth processes and patterns of glycan insertions. In addition to the final shape, any residual stresses may affect the subsequent growth of the cell. Both the shape due to a metric and the associated elastic quantities are therefore objects of interest in our theory.

**Target metric of a cell with uniform differential growth.** In this section, we find the target metric  $g^t$  for a growing *E. coli* cell subject to differential growth as a result of bending. This determines the form of  $E_{\text{stretch}}$ , which is needed to find the equilibrium embedding and stress profile.

We consider growth that is uniform along the cylinder length, meaning that if

$$g^t = \begin{pmatrix} g_{11}^b(1 + f_1(x, \theta))^2 & 0 \\ 0 & g_{22}^b(1 + f_2(x, \theta))^2 \end{pmatrix} = \begin{pmatrix} (1 + f_1(x, \theta))^2 & 0 \\ 0 & r^2(1 + f_2(x, \theta))^2 \end{pmatrix}, \quad (\text{S4})$$

where  $g^t$  is the target metric and  $g_{ij}^b$  are components of the initial, cylindrical metric, then  $f_1$  and  $f_2$  are functions of  $\theta$  alone that encode the geometric changes caused by the growth process. The condition that  $f_1$  and  $f_2$  are functions of  $\theta$  alone reflects our assumption that the differential growth is uniform over different cross-sections of the cell. We further postulate that differential growth acts in the direction of the long axis of the cell, so that  $f_2(\theta) = 0$ . This is the mode of growth if the PGEM adds new PG strands strictly along the circumference. We now determine the form of  $f_1(\theta)$ , which corresponds to growth that pushes apart points along the long axis, but not along the circumference.

We hypothesize that differential growth depends on the areal strain. The deformation of the cell, as it is confined in the microchamber, then determines the form of  $f_1(\theta)$ . The bending of a circular, cylindrical shell of radius  $r$  into a circular, toroidal shell results in a  $u_{xx}$  component of the form

$$u_{xx}^b \approx B \sin \theta, \quad (\text{S5})$$

a result that is familiar from Euler-Bernoulli beam theory. Here the superscript  $b$  denotes quantities induced by bending, and  $B$ , the *bending parameter*, is assumed small compared to unity and sets the curvature of the bent cylinder via  $R_{\text{curv}} = r/B$ , where  $R_{\text{curv}}$  is the major radius of the toroidal section (and hence the radius of the microchamber when the cell is confined). The strain tensor is expressed with respect to the surface coordinates  $(x, \theta)$ , where  $x = R_{\text{curv}}\phi$ ,  $\theta = y/r$ , and  $(\phi, \theta)$  are doubly polar coordinates.

Although we shall see that it is valid to ignore the cross-sectional ovalization due to bending in *E. coli*, it is also possible for the cell to react in the circumferential direction due to the Poisson effect so that  $\sigma_{yy}^b \approx 0$ . In confirmation of this, we numerically simulated a pressurized cylinder subjected to a bending moment using the finite-element software Abaqus FEA (Dassault Systems, Providence, RI). The simulation details are discussed in the Supplementary Methods. The results, which are summarized in Supplementary Fig. 1, suggest that  $\sigma_{xx}^b \approx YB \sin \theta$  and  $\sigma_{yy}^b \approx 0$ . Thus, from the Hookean constitutive relations for a linear-elastic material

$$u_{xx} = \frac{1}{Y}(\sigma_{xx} - \nu\sigma_{yy}), \quad u_{yy} = \frac{1}{Y}(\sigma_{yy} - \nu\sigma_{xx}), \quad (\text{S6})$$

we obtain  $u_{yy}^b = -\nu B \sin \theta$ .

From the strain tensor, it is easily seen that the areal strain  $A = (1 + u_{xx})(1 + u_{yy}) - 1$  caused by the deformation contains sinusoidal variations which are linear in  $B$ . We shall ignore the non-sinusoidal variations in  $A$ , which are higher-order in  $B$ . Consider now a growth rate which depends on the areal strain as described in the main text. For a pressurized bent cell, we anticipate that  $A \approx A_0 + A_1 \sin \theta$ , where the constant term is due to uniform stretching caused by pressure and the variational term comes from bending under microchamber confinement. If differential growth is proportional to the differential areal strain  $A_1 \sin \theta$ , then  $f_1(\theta) = c \sin \theta$ , where the coefficient  $c$  is set by the growth rates and the time of growth in the bent state. We call  $c$  the *differential growth parameter*, and relate  $c$  to  $A_1$  in Supplementary Note 2. The target metric prescribed by differential growth is then

$$g_{ij}^t = \begin{pmatrix} (1 + c \sin \theta)^2 & 0 \\ 0 & r^2 \end{pmatrix}, \quad (\text{S7})$$

which completely specifies the form of  $E_{\text{stretch}}$ . The equilibrium embedding and residual stresses in the presence of pressure are determined in the next section.

We finally return to the assumption that it is acceptable to ignore any cross-sectional ovalization caused by the longitudinal tension and compression which resist the applied bending moment. This ovalization is widely known as the *Brazier effect*, first studied by L. G. Brazier in 1927, and is responsible for the buckling behavior of cylindrical shells under bending [8]. However, in the presence of a large internal pressure which resists ovalization—as for the case of the *E. coli* cell wall—the cross-sectional eccentricity becomes vanishingly small. In particular, assuming that a typical cross-section deforms due to longitudinal tension and compression according to  $w = r\varepsilon \cos(2\theta)$ , where  $w$  is the radial component of displacement due to bending, we find

$$\varepsilon \approx \frac{Yt^2r^4}{t^2R_{\text{curv}}^2(Yt^2 + 4pr^3)} \approx \frac{Yr}{4R_{\text{curv}}^2p}, \quad (\text{S8})$$

where  $E$  is the three-dimensional elastic modulus,  $h$  is the thickness,  $\nu$  is the Poisson ratio of the shell,  $Y = Eh$ ,  $t = h(1 - \nu^2)^{-1/2}$ , and  $p$  is the internal pressure [9]. We see that  $\varepsilon$  is higher-order in  $B$ ; for characteristic values of  $h = 3$  nm,  $\nu = 1/3$ ,  $E = 30$  MPa,  $R_{\text{curv}} = 4$   $\mu\text{m}$ ,  $r = 0.5$   $\mu\text{m}$ , and  $p$  ranging from 0.3-2 atm (see Supplementary Table 1),  $\varepsilon = 0.004$ - $0.0234$ , which is small compared to  $B = r/R_{\text{curv}} = 0.125$  in our experiments. Interestingly, if *E. coli* were not internally pressurized, then the corresponding value of  $\varepsilon \approx 400$  surpasses the buckling limit of  $\varepsilon \approx 2/9$ , and the cell wall may have buckled inside the microchamber.

Note that the foregoing discussion applies only to the deformation of cylindrical shells under an applied bending moment. Although an internal pressure may intuitively resist cross-sectional deviations from a circle, this intuition is incorrect when considering the equilibrium of a pressurized torus of circular cross-section, as we do below. In particular, loading a circular torus with an internal pressure results in nontrivial cross-sectional deformations [10, 11].

**Numerical solution for a residually stressed cell.** Having determined the form of  $g^t$  in equation (S7), we now wish to determine the embedding and associated elastic quantities of the cell when released from the microchamber.

If the embedding of the cell were fully compatible with the target metric of equation (S7), then the cell wall may be parametrized by the surface  $\vec{r}(\phi, \theta) = ((R + r \sin \theta) \cos \phi, (R + r \sin \theta) \sin \phi, r \cos \theta)$ , which describes a circular toroid with major radius  $R = r/c$ . A direct calculation reveals that this parameterization has a metric tensor exactly matching that of equation (S7), and would be the embedding describing the cell wall if the pressure were small enough so that  $pV \ll E_{\text{stretch}}$  and the total energy is  $\mathcal{H} \approx E_{\text{stretch}}$ . The stress resultants of a circular torus loaded by an internal pressure  $p$  are, in surface coordinates  $(x, y) = (R\phi, r\theta)$ ,

$$\sigma_{xx} = \frac{pr}{2}, \quad \sigma_{yy} = \frac{pr}{2} \left( \frac{2 + c \sin \theta}{1 + c \sin \theta} \right). \quad (\text{S9})$$

This result assumes geometric linearity—namely, that pressure loading does not change the embedding  $\vec{r}$ —and results in an infinite displacement field at the crowns [12]. A solution which corrects for the latter involves a boundary layer analysis or detailed examination of geometric nonlinearity [10, 11]. In this work, we will not concern ourselves with this more detailed analysis.

Because equation (S9) assumes geometric linearity, it is not immediately applicable to the *E. coli* cell wall, which is under a large internal pressure and finitely strained. A large pressure may change the embedding that minimizes  $\mathcal{H}$ , resulting in geometric nonlinearity of the deformation gradient. Due to the path-independence of equilibrium states, we therefore consider the equivalent problem of loading a circular toroidal section with bending parameter  $c$  with a large internal pressure. This is a complicated problem for which an analytic, shell-theoretic solution is difficult. In order to explore whether or not a pressure of the same magnitude as *E. coli*'s turgor pressure may affect the embedding and thus the associated stress profile, we undertook numerical simulations using Abaqus FEA. The methodology is reviewed in the Sup-



plementary Methods; briefly, a capped toroidal section was initialized as a fine mesh and equilibrated with respect to a range of internal pressures. Although complicated, small-amplitude variations in  $\sigma_{xx}$  appear for large strains where  $pr/Y \approx 0.1$  (which is relevant to *E. coli*; see Supplementary Table 1), the numerical results are surprisingly well-approximated by the linear-theoretic stress profile of equation (S9) (Supplementary Figs. 2b-c).

We offer an interpretation of our numerical results, and in particular the lack of variation in  $\sigma_{xx}$ , by noting that there is negligible torque due to pressure for shells with circular cross-sections [1]. This would imply that, even in the presence of a large pressure, a non-circular cross-section is necessary for variation in the axial stresses. To see this, we consider a shell under internal pressure as pictured in Supplementary Fig. 2a. The upper-half portion of the shell, which is cut by the shaded plane, is in mechanical equilibrium. The sum of all forces acting on the region must vanish by the condition of equilibrium. The contribution to the torque exerted on the shell by pressure around a point  $A$  is exactly that coming from the contour above, which by force balance is equivalent to the torque associated with the cross-section containing  $A$ . Since the center of mass of a circular cross-section coincides with the moment center, there is no lever arm and this torque must vanish. Thus, a shell with circular cross-section cannot have a variational axial stress component. Further analysis of a toroidal shell with elliptic cross-section indicates that a finite eccentricity can result in sinusoidal variations in  $\sigma_{xx}$  [13]. These remarks are consistent with our simulation results, where we observed typical cross-sections of the deformed geometry to have a vanishingly small eccentricity.

In summary, our numerical results suggest that it is valid to approximate the stress profile of a cell in Phase 2 of our experiments with the linear result of equation (S9). From this, we remark that there are approximately no differential axial stresses at equilibrium, and in particular, that a growth mechanism which solely detects the axial stresses  $\sigma_{xx}$ , as implicated in previous work [14, 15], may fail to account for the observed straightening. However, as shown below, the nonvanishing variation in  $\sigma_{yy}$  results in a nonzero variation in the areal strain. Because the sign of this variation is opposite from that of the variation inside the microchamber, a growth mechanism which detects areal strain would result in straightening.

**Nonuniform crosslinking and anisotropic elasticity cannot explain straightening.** A previously proposed mechanism for shape regulation in bacteria, which may induce residual stresses in the cell wall, is the nonuniform crosslinking of glycan strands (or cleavage of peptide bonds, which can be considered similarly) [16]. Crosslinking inhomogeneity along the circumferential direction would be relevant if the crosslinking machinery in *E. coli* preferentially linked glycan strands according to local density or area.

To probe whether or not nonuniform crosslinking of glycan strands also produces variations in elastic quantities that can explain the observed straightening, we modeled crosslinking inhomogeneity by taking the elastic modulus of the cell wall to vary azimuthally:  $Y(\theta) = Y(1 + d \sin \theta)$ , where  $d$  is a parameter quantifying the magnitude of the inhomogeneity and  $Y$  is again the two-dimensional elastic modulus of the cell, viewed as an isotropic material. Because a formal, shell-theoretic solution of the equilibrium state is difficult, we determined the equilibrium stress profile numerically with Abaqus FEA simulations (Supplementary Fig. 3). Interestingly, our simulation results reveal that both  $\sigma_{xx}$  and the areal strains are larger on the outer edge of the deformed state, where  $Y$  is *smaller*. The possibility of stress-dependent crosslinking explaining straightening can be ruled out from this “sign error” alone: if a smaller axial stress or areal strain results in more crosslinking and an increased value of  $Y$  inside the microchamber, then upon release there would be a runaway effect with no straightening. If a larger axial stress or areal strain leads to more crosslinking, then the snapback in the microfluidics experiment discussed in the main text should have been in the direction opposite the applied flow [1]. We thus conclude that growth which localizes to the axial stresses or areal strains incurred by nonuniform crosslinking cannot explain our straightening observations.

Although we have modeled the *E. coli* cell wall as an isotropic shell described by two elastic constants ( $E, \nu$ ), there is also evidence that PG is stiffer in the circumferential direction than the axial direction due to the circumferential orientation of glycan strands [17, 18]. To probe whether cell wall anisotropy can lead to substantial variations in elastic quantities, we performed Abaqus FEA simulations in lieu of more complicated,

anisotropic elasticity calculations. We simulated an orthotropic half-toroidal shell with a circumferential elastic modulus twice as large as the axial one under internal pressure; this takes into account both the effects of differential growth and anisotropic elasticity. Our results, which are summarized in Supplementary Fig. 4, show small, non-sinusoidal variations in  $\sigma_{xx}$  and nearly identical variations in  $\sigma_{yy}$  compared to the differential growth case. Thus, although a more accurate model of cell wall elasticity may involve it, anisotropic elasticity is insufficient to explain our observations: it does not result in the form of  $\sigma_{xx}$  necessary for an axial stress-dependent growth rate to explain our straightening observations; neither does it yield larger variations in  $\sigma_{yy}$  than can be obtained simply by considering differential growth alone.

**Elastic quantities for a cell inside and outside the microchamber.** In order to model the coupling of growth to areal strains in the cell wall, we require the form of the areal strains both inside and outside the microchamber. The stress profile of a straight cylinder, i.e. that of the cell in the undeformed state, is  $\sigma_{xx} = pr/2$  and  $\sigma_{yy} = pr$ . By linear superposition of strains, the strain profile of a bent cell inside the microchamber is (c.f. equation (S5))

$$u_{xx}^{in} \approx \eta \left( \frac{1}{2} - \nu \right) + (B - c) \sin \theta, \quad u_{yy}^{in} = \eta \left( 1 - \frac{\nu}{2} \right) - \nu(B - c) \sin \theta, \quad (\text{S10})$$

where we have set  $\eta = pr/Y$  and anticipate  $\eta$ , a dimensionless pressure, to be of order unity in our experiments [14]. Note that the  $-c \sin \theta$  term arises from differential growth and adaptation of the cell to the bending force inside in microchamber. In particular, the differential growth parameter offsets the degree of bending, and the deformation can be viewed as one from a torus with bending parameter  $c$  to a torus with a bending parameter  $B$ .

We now recall the linear theory approximation to the residual stresses caused by differential growth:

$$\sigma_{xx}^{out} \approx \frac{pr}{2}, \quad \sigma_{yy}^{out} \approx \frac{pr}{2} \left( \frac{2 + c \sin \theta}{1 + c \sin \theta} \right) \approx pr - \frac{prc}{2} \sin \theta. \quad (\text{S11})$$

To first order in  $c$ , the areal strains  $A = (1 + u_{xx})(1 + u_{yy}) - 1$  both inside and outside the microchamber are

$$A^{in} = A_0^{in} + \delta A^{in} \approx \frac{6\eta + 2\eta^2 - 6\eta\nu - 5\eta^2\nu + 2\eta^2\nu^2}{4} + (1 + \eta - \nu - \eta\nu + \eta\nu^2) (B - c) \sin \theta, \quad (\text{S12})$$

$$A^{out} = A_0^{out} + \delta A^{out} \approx \frac{6\eta + 2\eta^2 - 6\eta\nu - 5\eta^2\nu + 2\eta^2\nu^2}{4} - \frac{c\eta}{4} (2 - 2\nu + \eta - 4\eta\nu + \eta\nu^2) \sin \theta. \quad (\text{S13})$$

Henceforth we will replace the “ $\approx$ ” symbol with “=” in equations (S12) and (S13) to avoid confusion with subsequent approximations.

If the quantity  $B - c$  is positive inside the microchamber, meaning that the differential growth relieves some but not all of the areal strain incurred by bending, then the variational terms  $\delta A^{in}$  and  $\delta A^{out}$  are opposite in sign inside and outside the microchamber for a broad range of material parameters relevant to *E. coli* (as summarized in Supplementary Table 1). A growth rate that depends on areal strain may therefore qualitatively account for the observed straightening. We show in the following sections that it is quantitatively consistent with the straightening as well, with an areal strain-growth coupling parameter that can be inferred directly from the snapback event.

## Supplementary Note 2

We now derive equation (3) in the main text and show that areal strain-dependent initiation of new glycan strands, according to the form of the areal strains from equations (S12) and (S13), is quantitatively consistent with the experimentally observed straightening rate. Our consideration of the growth dynamics of an unconfined toroidal shell can be generalized to other geometries and may be useful for describing the growth of other surfaces [14, 15].

**Dynamics.** If the initiation rate of new glycan strands is areal strain-dependent, then the growth at a given angle will depend on the initiations that happened at a different angle, with MreB decays being modeled as a Poisson process with rate  $1/\tau$ . Let  $k$  denote a constant, net rate of initiation per unit area. In a curved cell, the outer side of the cell is longer than the inner side, and thus the probability of initiation will be larger on the outer side of the cell if there is no strain-coupling. The infinitesimal surface area element on a small toroidal segment of radius  $r = R_{\text{cell}}$  and radius of curvature  $R_{\text{curv}}$  is

$$dA(\theta, t) = \left(1 + \frac{r}{R_{\text{curv}}} \sin \theta\right) d\bar{L}r d\theta = (1 + B(t) \sin \theta) d\bar{L}(t)rd\theta, \quad (\text{S14})$$

where  $d\bar{L} = d\bar{L}(t)$  is the infinitesimal width of the segment averaged over the cross-section at a time  $t$ , which is identical to the length along the midline. If the number of glycan strand initiations  $\gamma$  per unit area can be linearly decomposed into strain-independent and strain-dependent components as  $\gamma(\theta, t) = k + \alpha\delta A(\theta, t)$ , where  $k$  is a constant, strain-independent rate,  $\delta A(\theta, t)$  is the variational areal strain as a function of angle  $\theta$  and time  $t$ , and the parameter  $\alpha$  quantifies the intensity of growth-strain coupling (c.f. equation (2) in the main text), then the probability of initiation between angles  $\theta$  and  $\theta + d\theta$  at time  $t$  is

$$p(\theta, t)d\theta = \gamma(\theta, t)(1 + B(t) \sin \theta)rd\theta = (k + \alpha\delta A(\theta, t))(1 + B(t) \sin \theta)rd\theta. \quad (\text{S15})$$

In fact, the form of  $\gamma$  may be more generally applicable: if  $f[\delta A(\theta, t)]$  is a functional that quantifies the variational areal strain coupling with an intensity parameter  $\beta$ , then expanding  $f$  to first order in  $\delta A$  gives the initiation rate  $\gamma$  as

$$\gamma(\theta, t) = k + \beta f[\delta A(\theta, t)] = k + \beta(f_0 + f_1\delta A(\theta, t)), \quad (\text{S16})$$

where  $f_0$  and  $f_1$  are constants. By aggregating the constant terms, we recover equation (S15) above.

Note that  $k$  includes the effect of PG turnover [19, 20] and can be expressed in terms of the new glycan strand initiation rate  $k_{\text{new}}$  and the degradation rate  $k_{\text{deg}}$  as  $k = k_{\text{new}} - k_{\text{deg}}$ . From the self-consistent expressions of  $k$  and  $\alpha$  determined below, we see that characteristic values of  $\alpha\delta A$  are smaller than  $k_{\text{new}}$  and the ratio  $|\alpha\delta A|/k_{\text{new}} \approx 30\text{-}70\%$  (as can be found using the parameter values given in Supplementary Table 1 and equations (S12) and (S13)). This suggests that strain-dependent initiation of new glycan strands is typically a moderate effect relative to the total initiation of new glycan strands.

Let  $\tau$  denote the persistence time of MreB and  $M = v/r$  its angular speed. Since MreB is assumed to degrade as a Poisson process with rate  $1/\tau$ , the amount of material added per initiation event by an MreB molecule going in the  $+\theta$  direction as a function of  $\theta$  is  $\Delta L_s(\theta) = L_0 e^{-\theta/M\tau}$ , where  $L_0$  is the width of one PG insert. The growth rate is given by convolving  $p$  and  $\Delta L_s$  over  $\theta$ , resulting in the integro-differential ‘‘growth’’ equation

$$\begin{aligned} \frac{1}{\bar{L}} \frac{\partial L}{\partial t} \Big|_{\theta} &\approx \frac{L_0 r}{2} \left( \int_{-\infty}^{\theta} d\theta' \gamma \left( \theta', t - \frac{\theta - \theta'}{M} \right) \left( 1 + B \left( t - \frac{\theta - \theta'}{M} \right) \sin \theta' \right) e^{-\frac{\theta - \theta'}{M\tau}} e^{-\frac{\theta - \theta'}{M} \lambda} \right. \\ &\quad \left. + \int_{\theta}^{\infty} d\theta' \gamma \left( \theta', t + \frac{\theta - \theta'}{M} \right) \left( 1 + B \left( t + \frac{\theta - \theta'}{M} \right) \sin \theta' \right) e^{\frac{\theta - \theta'}{M\tau}} e^{\frac{\theta - \theta'}{M} \lambda} \right), \end{aligned} \quad (\text{S17})$$

where the second integral is the result of taking MreB molecules moving in the opposite  $-\theta$  direction ( $M \mapsto$

$-M$  and  $[-\infty, \theta] \mapsto [\theta, \infty]$ ) and we summarize the notation as follows:

$L = L(\theta, t)$  is the pole-to-pole length of the cell at angle  $\theta$  and time  $t$ ;  
 $\bar{L}$  is the *average* length over angles  $\theta$ , which is identical to the length of the midline;  
 $L_0$  is the width of one PG insertion;  
 $r$  is the radius of the cell;  
 $\delta A(\theta, t)$  is the differential areal strain (dimensionless);  
 $\alpha$  is a parameter for the growth rate-areal strain coupling (units of  $1/(\text{area}\cdot\text{time})$ );  
 $k$  is a constant initiation rate per area (units of  $1/(\text{area}\cdot\text{time})$ );  
 $M$  is the circumferential speed of MreB (units of radians/time);  
 $\tau$  is the persistence time of MreB;  
 $\lambda$  is the normalized growth rate of the cell, equivalent to  $d\bar{L}/(\bar{L}dt)$ ;  
 $c = c(t)$  is the differential growth parameter of the cell; and  
 $B = B(t)$  is the bending parameter of the cell.

(A full summary of all the persistent notation used in this work appears in Supplementary Table 1.) Note that equation (S17) is an approximation, as for simplicity we have taken the limits of integration to  $\mp\infty$  instead of bounding them. This approximation is supported for the parameter values tabulated in Supplementary Table 1 by simulations of the discrete growth process, as detailed in the Supplementary Methods (see also Supplementary Fig. 5 and Supplementary Video 11). To avoid confusion with subsequent approximations, we will again replace the “ $\approx$ ” symbol with “ $=$ ” in equation (S17).

In the growth equation (S17), the  $\exp(\pm\lambda|\theta - \theta'|/M)$  factors come from the identity  $\bar{L}(t_0) = \bar{L}(0) \exp(\lambda t_0)$ : the initiation of growth sites in the past not only depends on the strain profile in the past, but also the length (and curvature) of the cell in the past. Noting that  $\lambda$  sets a timescale and the processivity  $M\tau$  sets the scale for angles, it is clear that the rate  $k \sim \lambda/L_0 r M \tau$ . We now find the exact, self-consistent expression for  $k$  by considering growth without areal strain-coupling.

**Differential growth and straightening with no strain-coupling.** If the areal strain-growth coupling parameter  $\alpha = 0$ , then the length profile  $L$  in this case satisfies

$$\begin{aligned}
 \frac{1}{\bar{L}} \frac{\partial L}{\partial t} &= \frac{L_0 r}{2} \left( \int_{-\infty}^{\theta} d\theta' k \left( 1 + B \left( t - \frac{\theta - \theta'}{M} \right) \sin \theta' \right) e^{-\frac{\theta - \theta'}{M\tau}} e^{-\frac{\theta - \theta'}{M} \lambda} \right. \\
 &\quad \left. + \int_{\theta}^{\infty} d\theta' k \left( 1 + B \left( t + \frac{\theta - \theta'}{M} \right) \sin \theta' \right) e^{\frac{\theta - \theta'}{M\tau}} e^{\frac{\theta - \theta'}{M} \lambda} \right) \\
 &= \frac{k L_0 r M \tau}{1 + \lambda \tau} \left( 1 + \frac{(1 + \lambda \tau)(1 + \lambda \tau(1 - S))}{(1 + \lambda \tau(1 - S))^2 + (M\tau)^2} B(t) \sin \theta \right),
 \end{aligned} \tag{S18}$$

where we assume the ansatz  $B(t) = B_0 \exp(-\lambda S t)$  and, as in a previous work, define  $S$  as the *straightening coefficient* [16]. A differential growth  $f_1(\theta, t) = c(t) \sin \theta$  multiplies the average length  $\bar{L}(t) = \bar{L}(0) \exp(\lambda t)$  by a factor  $1 + c(t) \sin \theta$  along the  $x$ -direction:  $L(\theta, t) = \bar{L}(t)(1 + c(t) \sin \theta)$ , where we also identify  $c(t) = B(t)$  once the cell has equilibrated. For self-consistency, we require the expression in equation (S18) to equal

$$\frac{1}{\bar{L}} \frac{\partial L}{\partial t} = \frac{1}{\bar{L}(t)} \frac{\partial(\bar{L}(t)(1 + B(t) \sin \theta))}{\partial t} = \lambda(1 + (1 - S)B(t) \sin \theta). \tag{S19}$$

(Note that we assume, in interpreting the results of our MreB experiments in Fig. 5 of the main text, that MreB density is proportional to  $\frac{1}{L} \frac{\partial L}{\partial t}$  in this equation.) We thus see that

$$k = \frac{\lambda(1 + \lambda \tau)}{M\tau L_0 r} \quad \text{and} \quad 1 - S = \frac{(1 + \lambda \tau)(1 + \lambda \tau(1 - S))}{(1 + \lambda \tau(1 - S))^2 + (M\tau)^2}. \tag{S20}$$

The straightening coefficient is self-consistently described by a solution to a cubic equation. Equation (S20) differs from the corresponding expressions

$$k = \frac{\lambda}{M\tau L_0 r} \quad \text{and} \quad S = \frac{(M\tau)^2}{1 + (M\tau)^2} \quad (\text{S21})$$

in [16], where the authors assumed that  $\lambda\tau \ll 1$  and set  $B(t) = r/R_{\text{CURV}}$ ; namely, in [16], corrections to the area element due to length contraction and the decay of curvature  $B(t) = B_0 \exp(-\lambda St)$  were neglected. Neglecting these corrections can be useful for gaining intuition, as instead of the cubic equation for  $S$ , we obtain the simple form of equation (S21). In general, due to the coupling between straightening and area-dependent initiation, equation (S20) and not equation (S21) yields the correct expression for  $S$ . However, in the limit that  $M\tau \rightarrow \infty$ , both equation (S20) and equation (S21) yield  $S \rightarrow 1$ . In the limit that  $M\tau \rightarrow 0$  and  $\lambda\tau \ll 1$ , both equations also yield  $S \rightarrow 0$ .

Thus, both expressions for  $S$  result in a similar picture: assuming that  $\lambda\tau \ll 1$ , which is consistent with the parameter values in Supplementary Table 1, proportional growth is recovered in the zero processivity case  $M\tau = 0$ , where  $S = 0$  and  $B(t) = B_0$ . The infinite processivity case is recovered by taking  $S \rightarrow 1$ , so that  $B(t) = B_0 \exp(-\lambda t)$ . In the limit of high processivity with no strain-coupling, the bending parameter  $B(t)$  therefore decays exponentially with the growth rate, agreeing with the result in [16]. In summary, without strain-coupling the cell straightens as

$$B(t) \sim \begin{cases} \text{const.} & \text{zero processivity, no strain-coupling; no straightening} \\ \exp(-\lambda t) & \text{infinite processivity, no strain-coupling; straightening rate equals growth rate.} \end{cases} \quad (\text{S22})$$

We note again that the latter case, in which the straightening rate equals the growth rate, leads to self-similarity and not actual ‘‘straightening.’’ In particular, the *aspect ratio*  $L(t)B(t)$  does not decay with time.

**Small processivity with strain-coupling.** If the areal strain-coupling parameter  $\alpha$  does not vanish, then the growth equation assumes the full form of equation (S17):

$$\begin{aligned} \frac{1}{L} \frac{\partial L}{\partial t} \Big|_{\theta} &= \frac{L_0 r}{2} \left( \int_{-\infty}^{\theta} d\theta' \gamma \left( \theta', t - \frac{\theta - \theta'}{M} \right) \left( 1 + B \left( t - \frac{\theta - \theta'}{M} \right) \sin \theta' \right) e^{-\frac{\theta - \theta'}{M\tau}} e^{-\frac{\theta - \theta'}{M} \lambda} \right. \\ &\quad \left. + \int_{\theta}^{\infty} d\theta' \gamma \left( \theta', t + \frac{\theta - \theta'}{M} \right) \left( 1 + B \left( t + \frac{\theta - \theta'}{M} \right) \sin \theta' \right) e^{\frac{\theta - \theta'}{M\tau}} e^{\frac{\theta - \theta'}{M} \lambda} \right), \end{aligned} \quad (\text{S23})$$

where

$$\gamma(\theta, t) = \frac{\lambda(1 + \lambda\tau)}{L_0 r M\tau} + \alpha \delta A(\theta, t). \quad (\text{S24})$$

Evaluating equation (S23) gives

$$\frac{1}{L} \frac{\partial L}{\partial t} \Big|_{\theta} = \lambda(1 + (1 - S)B(t) \sin \theta) + J, \quad (\text{S25})$$

where

$$\begin{aligned} J &= \frac{L_0 r}{2} \left( \int_{-\infty}^{\theta} d\theta' \alpha \delta A \left( \theta', t - \frac{\theta - \theta'}{M} \right) \left( 1 + B \left( t - \frac{\theta - \theta'}{M} \right) \sin \theta' \right) e^{-\frac{\theta - \theta'}{M\tau}} e^{-\frac{\theta - \theta'}{M} \lambda} \right. \\ &\quad \left. + \int_{\theta}^{\infty} d\theta' \alpha \delta A \left( \theta', t + \frac{\theta - \theta'}{M} \right) \left( 1 + B \left( t + \frac{\theta - \theta'}{M} \right) \sin \theta' \right) e^{\frac{\theta - \theta'}{M\tau}} e^{\frac{\theta - \theta'}{M} \lambda} \right) \end{aligned} \quad (\text{S26})$$

is nonnegative and describes the contribution of strain-coupling to straightening. Here the ‘‘straightening coefficient’’  $S$  no longer appears in the expression for  $B(t)$ , but is a variable that conveniently satisfies an

equation analogous to equation (S20):

$$1 - S = \frac{(1 + \lambda\tau)(1 + \lambda\tau - \mu\tau)}{(1 + \lambda\tau - \mu\tau)^2 + (M\tau)^2}, \quad (\text{S27})$$

for  $B(t) = B_0 \exp(-\mu t)$ . We leave  $J$  unevaluated for now and focus instead on the growth *inside* the microchamber.

For the cell to grow at a constant differential growth  $c^0$  inside the microchamber under a constant strain-coupling parameter  $\alpha$ , a self-consistency criterion must be satisfied. In particular, considering the growth profile within the microchamber gives us an equation relating the constant differential growth  $c^0$  within the microchamber to the strain-coupling parameter  $\alpha$ . Inside the microchamber, the cell is subject to an areal strain of the form of equation (S12), which is proportional to the constant bending parameter  $B^0$  and relieved by a constant, self-consistent value of the differential growth parameter  $c^0$ . For the sign of the differential growth to be consistent with that of the differential areal strains, we require  $B^0 \geq c^0$ . The differential areal strain profile of the cell inside the microchamber, as given by equation (S12), is

$$\delta A(\theta, t) = (1 + \eta - \nu - \eta\nu + \eta\nu^2) (B^0 - c^0) \sin \theta. \quad (\text{S28})$$

We demand the differential growth to be at a steady state in the microchamber so that  $dc(t)/dt = 0$  and, from equation (S19), write

$$\lambda(1 + c^0 \sin \theta) \approx \lambda(1 + (1 - S)B^0 \sin \theta) + J_1, \quad (\text{S29})$$

where  $J_1 \propto \alpha(B^0 - c^0) \sin \theta$  is defined analogously to  $J$  but with the differential areal strain  $\delta A(\theta, t)$  *inside* the microchamber as shown in equation (S28). Note additionally that  $J_1$  is nonnegative. In the limit of small processivity and assuming that  $\lambda\tau, \mu\tau \ll 1$ ,  $S \rightarrow 0$  and equation (S29) reduces to

$$(c^0 - B^0) \sin \theta = J_1 \propto \alpha(B^0 - c^0) \sin \theta. \quad (\text{S30})$$

Thus, the only physical, self-consistent solution (with  $\alpha \geq 0$ ) for  $c^0$  is that the cell is differentially strain-free, i.e.  $B^0 = c^0$ . In this case, when the cell is released from the microchamber, there would be no snapback because the microchamber bending parameter  $B^0$  and the differential growth  $c^0$  are equal; the cell has adapted completely to the shape of the microchamber. Since we have found a nonvanishing elastic snapback in our experiments, we conclude that the case of small processivity with strain-coupling is inconsistent with the PG synthesis machinery in *E. coli*.

**Large processivity with strain-coupling.** Parameter values suggest that large processivity is relevant to MreB: assuming a persistence time of  $\tau = 5$  mins and a spot velocity of  $v = 5$  nm/sec [3, 21, 22], the processivity, in units of length, is  $M\tau r = 1.5\mu\text{m}$  where  $M = v/r = 0.01$  rad/sec and the cell radius  $r = 0.5\mu\text{m}$ . For  $\lambda\tau, \mu\tau \ll 1$ , this corresponds to a straightening coefficient of  $S = 0.9$ . For these large processivities, the growth due to coupling to areal strain is given again by equation (S23). Temporarily ignoring the constant terms in the integrands and taking the zeroth-order term in  $B(t)$ , the relevant integrals describing the growth *after release from the microchamber* are proportional to

$$\int_{-\infty}^{\theta} d\theta' c \left( t - \frac{\theta - \theta'}{M} \right) e^{-\frac{\theta - \theta'}{M\tau}} e^{-\frac{\theta - \theta'}{M}\lambda} \sin \theta' + \int_{\theta}^{\infty} d\theta' c \left( t + \frac{\theta - \theta'}{M} \right) e^{\frac{\theta - \theta'}{M\tau}} e^{\frac{\theta - \theta'}{M}\lambda} \sin \theta'. \quad (\text{S31})$$

We therefore need to specify the form of  $c(t)$ . Taking  $t = 0$  to be the time when the cell is released from the microchamber, we assume an ansatz for  $c(t)$  of the form

$$c(t) = \begin{cases} c^0 \exp(-\mu t) & t \geq 0 \\ c^0 & t < 0 \end{cases} \quad (\text{S32})$$

and, to be precise, bound the limits of integration so that we integrate starting from a time  $t_0 = t + t_c$  in the

past, where  $t_0 \rightarrow \infty$  is the total time the cell has been in existence (i.e., the sum of both the confined time  $t_c$  and released time  $t$  from the microchamber). We recall that the differential areal strain profile is

$$\delta A(\theta, t) = \begin{cases} -\frac{c\eta}{4}(2 - 2\nu + \eta - 4\eta\nu + \eta\nu^2) \sin \theta \equiv \xi_1 c \sin \theta & t \geq 0 \\ (1 + \eta - \nu - \eta\nu + \eta\nu^2)(B^0 - c) \sin \theta \equiv \xi_0(B^0 - c) \sin \theta & t < 0, \end{cases} \quad (\text{S33})$$

where we have defined  $\xi_0$  and  $\xi_1$  so that  $\xi_0 > 0$  and  $\xi_1 < 0$  for the parameter values listed in Supplementary Table 1. Thus, neglecting terms in the integrand of equation (S23) which are of order  $B^2$ , we have

$$\frac{1}{\bar{L}} \frac{\partial L}{\partial t} \Big|_{\theta} = \lambda(1 + (1 - S)B(t) \sin \theta) + \frac{L_0 r}{2}(I_1 + I_2), \quad (\text{S34})$$

where  $I_1$  and  $I_2$  are defined as the integrals

$$\begin{aligned} I_1 &= \alpha \xi_0 (B^0 - c^0) \int_{\theta - Mt_0}^{\theta - Mt} d\theta' e^{-\frac{\theta - \theta'}{M\tau}} e^{-\frac{\theta - \theta'}{M}\lambda} \sin \theta' \\ &\quad + \alpha \xi_1 \int_{\theta - Mt}^{\theta} d\theta' c \left( t - \frac{\theta - \theta'}{M} \right) e^{-\frac{\theta - \theta'}{M\tau}} e^{-\frac{\theta - \theta'}{M}\lambda} \sin \theta', \end{aligned} \quad (\text{S35})$$

$$\begin{aligned} I_2 &= \alpha \xi_0 (B^0 - c^0) \int_{\theta + Mt}^{\theta + Mt_0} d\theta' e^{\frac{\theta - \theta'}{M\tau}} e^{\frac{\theta - \theta'}{M}\lambda} \sin \theta' \\ &\quad + \alpha \xi_1 \int_{\theta}^{\theta + Mt} d\theta' c \left( t + \frac{\theta - \theta'}{M} \right) e^{\frac{\theta - \theta'}{M\tau}} e^{\frac{\theta - \theta'}{M}\lambda} \sin \theta'. \end{aligned} \quad (\text{S36})$$

This is the same calculation as the small processivity case with  $J = I_1 + I_2$ ; however, we now desire to evaluate these integrals explicitly. Doing so, we find

$$I_1 + I_2 = \alpha \xi_0 (B^0 - c^0) \Psi_1 \sin \theta + \alpha \xi_1 \Psi_2 \sin \theta, \quad (\text{S37})$$

where

$$\Psi_1 = \frac{2M\tau(e^{-(\lambda+1/\tau)t}((1 + \lambda\tau) \cos(Mt) - M\tau \sin(Mt)) + e^{-(\lambda+1/\tau)t_0}(-(1 + \lambda\tau) \cos(Mt_0) + M\tau \sin(Mt_0)))}{(1 + \lambda\tau)^2 + (M\tau)^2} \quad (\text{S38})$$

and

$$\Psi_2 = \frac{2c^0 M\tau(e^{-\mu t}(1 - \mu\tau + \lambda\tau) - e^{-(\lambda+1/\tau)t}(1 - \mu\tau + \lambda\tau) \cos(Mt) + M\tau e^{-(\lambda+1/\tau)t} \sin(Mt))}{1 - 2\mu\tau + 2\lambda\tau + (\mu\tau)^2 - 2\mu\lambda\tau^2 + (\lambda\tau)^2 + (M\tau)^2}. \quad (\text{S39})$$

The expression for  $I_1 + I_2$  contains oscillations that decay as  $\exp(-(\lambda+1/\tau)t)$ .  $1/\tau$  is a rate that is larger than the growth rate in our experiments: as  $t_d \approx 30$  min, the MreB persistence time  $\tau \approx t_d/6$ . Since biological parameter values suggest that it is valid to assume  $1/\tau \gg \mu \geq \lambda$ , i.e. that the persistence time of MreB is smaller than the doubling time of the cell (see also Supplementary Table 1), we can take the  $e^{-(\lambda+1/\tau)t} \cos(Mt)$  and  $e^{-(\lambda+1/\tau)t} \sin(Mt)$  terms above to be small in comparison to  $e^{-\mu t}$ , and the  $e^{-(\lambda+1/\tau)t_0} \cos(Mt_0)$  and  $e^{-(\lambda+1/\tau)t_0} \sin(Mt_0)$  terms to vanish for large enough  $t_0$ . Thus we have

$$I \equiv I_1 + I_2 \approx \frac{2\alpha \xi_1 c^0 M\tau e^{-\mu t} (1 - \mu\tau + \lambda\tau) \sin \theta}{1 - 2\mu\tau + 2\lambda\tau + (\mu\tau)^2 - 2\mu\lambda\tau^2 + (\lambda\tau)^2 + (M\tau)^2}. \quad (\text{S40})$$

We then impose the self-consistency criterion from equation (S19), which describes the action of the differential growth  $c$  on the length  $\bar{L}$ :

$$\frac{dc(t)}{dt} \sin \theta + \lambda(1 + c(t) \sin \theta) = \lambda(1 + (1 - S)B(t) \sin \theta) + \frac{L_0 r}{2} I. \quad (\text{S41})$$

Note additionally that  $S \rightarrow 1$  in the infinite processivity limit. Equation (S41) then becomes a cubic equation for  $\mu$  which can be solved numerically. However, to first find the value of  $c^0$  that gives a self-consistent differential growth profile within the microchamber, we again demand the differential growth to be at a steady state in the microchamber, so that  $dc(t)/dt = 0$  for  $t < 0$  and, for the confined differential areal strain profile  $\delta A(\theta, t) = \xi_0(B^0 - c^0) \sin \theta$ ,

$$\begin{aligned} \lambda c^0 \sin \theta &= \frac{L_0 r}{2} \left( \alpha \xi_0 (B^0 - c^0) \int_{\theta - Mt_c}^{\theta} d\theta' e^{-\frac{\theta - \theta'}{M\tau}} e^{-\frac{\theta - \theta'}{M}} \lambda \sin \theta' \right. \\ &\quad \left. + \alpha \xi_0 (B^0 - c^0) \int_{\theta}^{\theta + Mt_c} d\theta' e^{\frac{\theta - \theta'}{M\tau}} e^{\frac{\theta - \theta'}{M}} \lambda \sin \theta' \right) \\ &\approx \frac{\alpha \xi_0 (B^0 - c^0) L_0 r M \tau \sin \theta}{(1 + \lambda \tau)^2 + (M\tau)^2} \left( (1 + \lambda \tau) - e^{-(\lambda + 1/\tau)t_c} \left( (1 + \lambda \tau) \cos(Mt_c) - M\tau \sin(Mt_c) \right) \right), \end{aligned} \quad (\text{S42})$$

where the cell has been inside the microchamber for a time  $t_c$ , which is the same as the time the cell has been in existence (and assumed to be large). Thus, the constant differential growth inside the microchamber is given by

$$c_0 \approx \frac{\alpha B^0 L_0 r M \tau \xi_0}{\lambda + \lambda M^2 \tau^2 + \alpha L_0 r M \tau \xi_0} \approx \frac{\alpha B^0 L_0 r \xi_0}{\lambda M \tau + \alpha L_0 r \xi_0}, \quad (\text{S43})$$

where we again ignore the oscillations that decay as  $-t_c/\tau$  by assuming that the persistence time of the MreB is small compared to the doubling time,  $1/\tau \gg \mu \geq \lambda$ , and that  $t_c$  is large. The second approximation uses the assumption of large processivity,  $M\tau \gg 1$ .

To relate the straightening rate  $\mu$  to the snapback ratio  $\kappa$ , we note that, when the cell is removed from the microchamber, it elastically snaps to a bent cylinder described by the bending parameter  $B_{\text{snapback}} = c^0$ . Thus,  $\kappa$  is related to  $c^0$  as

$$\kappa = \frac{B_{\text{snapback}}}{B^0} = \frac{c^0}{B^0} \implies c^0 = B^0 \kappa. \quad (\text{S44})$$

For our theory of areal strain-dependent differential growth to be self-consistent, we require  $B^0 \geq c^0$ , or  $\kappa \leq 1$ , which agrees with our experimental observations. We may now solve equation (S41) for  $\mu$  to get the straightening enhancement in terms of  $\kappa$  and related parameters.

**Large processivity: approximating the straightening rate.** Supposing that  $M\tau \gg 1 \gg \mu\tau > \lambda\tau$ , the integral  $I$  in equation (S40) assumes the form

$$I \approx \frac{2\alpha \xi_1 c^0 e^{-\mu t} \sin \theta}{M\tau}. \quad (\text{S45})$$

Then equation (S41) reads, for  $c(t) = c^0 \exp(-\mu t)$ ,

$$\frac{dc(t)}{dt} \sin \theta + \lambda c(t) \sin \theta = (-c^0 \mu e^{-\mu t} + \lambda c^0 e^{-\mu t}) \sin \theta = \frac{L_0 r}{2} I. \quad (\text{S46})$$

Thus

$$\mu \approx \lambda - \frac{\alpha \xi_1 L_0 r}{M\tau}, \quad (\text{S47})$$

where we recall that  $\xi_1 < 0$ . Similarly, if  $M\tau \gg 1 \gg \mu\tau > \lambda\tau$ , from equation (S43) we have

$$c_0 \approx \frac{\alpha B^0 L_0 r \xi_0}{\lambda M \tau + \alpha L_0 r \xi_0}, \quad (\text{S48})$$

which also leads to an expression for the areal strain-growth coupling parameter  $\alpha$  in terms of the snapback ratio  $\kappa$  as

$$\alpha \approx \frac{c^0 M \lambda \tau}{L_0 r \xi_0 (B^0 - c^0)} = \frac{\kappa M \lambda \tau}{L_0 r \xi_0 (1 - \kappa)}. \quad (\text{S49})$$



Substituting equation (S49) into equation (S47), we have

$$\mu \approx \lambda \left( 1 - \frac{\kappa \xi_1}{(1 - \kappa) \xi_0} \right). \quad (\text{S50})$$

This approximation agrees well with numerical solutions of the full equation (S23) above, which are shown in Fig. 3 of the main text and Supplementary Fig. 6a. The methodology of the numerical analysis is described in the Methods section of the main text.

**Infinite MreB persistence and non-monotonicity of the straightening rate.** If  $\tau \rightarrow \infty$  but we do not assume that  $1/\tau \gg \lambda$ , then MreB can persist longer than the doubling time of the cell, and the  $e^{-(\lambda+1/\tau)t}$  terms cannot be neglected in equation (S37). A numerical solution of equation (S23) then shows that this leads to more oscillations, but a lower averaged straightening rate compared to the case of an intermediate processivity. For the parameter values summarized in Supplementary Table 1, Supplementary Fig. 6 shows a numerical solution of equation (S23) in both the regimes  $\tau : M\tau \gg 1 \gg \mu\tau > \lambda\tau$  and  $\tau : M\tau \gg \mu\tau > \lambda\tau > 1$ , which numerically confirms the existence of curvature oscillations in the latter case.

As discussed in the main text, the straightening rate  $\mu$  is non-monotone in the processivity  $\tau$  (measured in units of time, assuming a constant angular speed  $M$ ). Indeed, although straightening arises from the differential initiation of new glycan strands, previous growth sites can still be active and “wash away” the effect of areal strain-dependent initiation. We may quantify the non-monotonicity of  $\mu$  by solving equation (S41)—which holds for any processivity—without assuming either the limit of zero or infinite processivity. For simplicity, however, we consider only a finite range of  $\tau$  where  $1/\tau \gg \mu \geq \lambda$ , so that equation (S40) is still valid. Additionally, inside the microchamber, equation (S42) is modified to become

$$\lambda c^0 \sin \theta - \lambda(1 - S)B^0 \sin \theta \approx \frac{\alpha \xi_0 (B^0 - c^0) L_0 r M \tau \sin \theta}{1 + (M\tau)^2}. \quad (\text{S51})$$

The corrected form of the differential growth  $c^0$  is therefore related to the strain-coupling parameter  $\alpha$  as

$$\alpha = \frac{\lambda(c^0 - (1 - S)B^0)(1 + (M\tau)^2)}{L_0 r M \tau \xi_0 (B^0 - c^0)}. \quad (\text{S52})$$

The second equation is only valid if  $\alpha \geq 0$ , and in particular  $c^0 \geq (1 - S)B^0$ ; otherwise the choice of processivity is inconsistent with the observation of an elastic snapback, and the self-consistent solution requires the cell to be differentially strain-free as in the zero processivity case. With these corrections, equation (S41) is a cubic equation in  $\mu$  that can be numerically solved as a function of  $\tau$  when  $1/\tau \gg \mu \geq \lambda$ . The resulting numerical solution of  $\mu$ , which is non-monotone in  $\tau$ , is plotted over the domain  $\tau \in [1 \text{ min}, 50 \text{ min}]$  in Fig. 3d of the main text and compared to the quantity  $\lambda S(\tau)$ , where  $S(\tau)$  is numerically found by solving equation (S20) for the values of  $M$  and  $\lambda$  tabulated in Supplementary Table 1 and describes the straightening rate in the case of growth without areal strain-coupling. This calculation also allowed us to verify the validity of the approximation  $M\tau \gg 1$  used above, as we have assumed that, for MreB,  $M\tau = 3 \text{ rad}$  (Supplementary Table 1). For the range of parameter values considered in the main text, we found that the corrected values of  $\mu$  due to finite processivity deviate by less than 10% from the prediction of equation (S50).

## Supplementary Discussion

**Consistency with past microfluidics experiments.** In [1], one of us applied a hydrodynamic drag force on filamentous *E. coli* and *B. subtilis* cells and observed the deformation to induce both elastic bending and plastic remodeling of the cell wall. The deformed cells always recovered their straight, rod-like shape after growth, agreeing with the observations made in this study.

One detail that differs between the current experiment and the microfluidics setup is the degree of snapback observed by the cell upon equilibration. In [1], the authors observed characteristic snapback ratios of  $\kappa \approx 0.5$ , while we found  $\kappa = 0.78$  (see the Supplementary Methods). We can explain the discrepancy between these two observations by noticing that the areal strain profile incurred by the bending of a cell under a hydrodynamic drag force is nonuniform in the axial direction  $x$ . In particular, the cell has a nonuniform bending parameter  $B(x)$  along its length. Qualitatively, the differential initiation rate of such a cell would be smaller than the differential initiation rate of a cell bent uniformly by a bending parameter equal to the maximal value of  $B(x)$ . To reconcile these different snapback ratios quantitatively, we showed that they were consistent with each other under a common set of parameter values. Since a cell under hydrodynamic drag has complicated growth dynamics owing to the nonuniform stress profile, we performed MATLAB-based simulations of PG growth that numerically predicted the snapback in the experimental setup of [1]. We found several combinations of material parameter values and processivity values, in the range of those tabulated in Supplementary Table 1, that predicted both a snapback of  $\kappa \approx 0.5$  in [1] and a snapback of  $\kappa \approx 0.7$  in the current protocol. Furthermore, this check for self-consistency suggested a processivity of  $M\tau = 3$  to 6 radians and, assuming a constant spot velocity of  $v = 5$  nm/s, an MreB persistence time of  $\tau = 5$  to 10 minutes. This is consistent with the experimental value of  $\tau$  found in [23].

**Hyperosmotic shock during recovery.** For a large enough hyperosmotic shock, we expect the cellular turgor pressure to decrease and the straightening rate, which now depends on a smaller variational areal strain, to also decrease. We therefore verified that the cellular growth curves were similar during different degrees of osmotic shock (Supplementary Fig. 11a) and osmotically shocked cells with 100 mM and 250 mM LB+sorbitol solution upon release from the same microchamber environment in Phase 2. These osmotic shock magnitudes are believed to be sufficient to decrease the cellular turgor pressure by several atmospheres [24] and hence noticeably affect straightening. For 20-30 cells in each osmolarity, however, we found no evidence of osmotic shock affecting the straightening rate (Supplementary Fig. 11b). We attribute the absence of an effect on straightening to osmoregulation, which is believed to occur on a timescale  $\sim 1$  min [24, 25]. The fast timescale in which osmotic homeostasis occurs, relative to straightening, calls for more complex experimental protocols which can ascertain that the cellular turgor pressure is continually lowered over a timescale of  $\sim 30$  min.

## Supplementary Methods

**CurvatureTracker: a MATLAB-based software package for curvature analysis.** A summary of *CurvatureTracker*'s methodology can be found in the Methods section of the main text. Supplementary Fig. 7 shows an example of two image sequences involving the straightening of two distinct cells that were successfully tracked by *CurvatureTracker*.

Because the processed images have varying dimensions in pixels, we normalized all length quantities by the length (in pixels) of the cell in the first frame, and multiplied by the expected length at release,  $f\pi d$ , where  $f$  is the fraction of the microchamber the cell filled and  $d$  is the diameter of the microchamber, to obtain physical lengths.

In analyzing the straightening data with *CurvatureTracker*, we observed long tail behavior when the cell curvature was plotted as a function of time, which we believe to be indicative of substrate pinning or excessive growth whereby the cell became confined to the square microchamber and had insufficient space to straighten. We therefore truncated the dataset by discarding points over approximately 20 minutes ( $2/3$  the doubling time) of straightening and extracting the growth and straightening rates anew (Supplementary Fig. 8a). Because of the large density of data points at small times, we found that the corrected values differed only by less than 5%. For simplicity, we report all extracted values in our work using the full, untruncated time series. Below, we discuss the two different fits, local and global, that were used to describe the cell curvature.

**Image analysis methodology.** As a check on our experimental setup and *CurvatureTracker*, we checked that the normalized relative growth rate  $\lambda = dL/(Ldt)$  should be constant and positive, so that  $L(t) = L_0 \exp(\lambda t)$  (note that we have dropped the bar on the  $L$ , which denoted length along the midline). From the 60 processed image sequences, we extracted a mean value of

$$\lambda = 0.0416/\text{frame} = 0.0208 \text{ min}^{-1}. \quad (\text{S53})$$

This corresponds to a doubling time of  $\ln(2)/\lambda \approx 33$  min for *E. coli*, in agreement with the literature (around 30 minutes at 30°C [26, 27]; note also that the time between each imaged frame is 2 minutes). Similarly, if curvature decays exponentially as a function of time, then the relative decay rate over any interval  $X = [x_0, x_1]$  along the midline of the cell  $\mu(X) = -\partial C(X, t)/(C(X, t)\partial t)$ , where  $C(X, t)$  is the average curvature at segment  $X$  at time  $t$ , should be constant and positive so that  $C(X, t) = C_0(X) \exp(-\mu t)$ . We take  $X = [0.2, 0.8] \times (\text{cell length})$ , so that we consider the summed curvatures over the entire cell; in practice, the cell is divided into 10 ordered segments along its length and we average the absolute value of the curvature over segments 2 to 9. This method produced less noisy results as compared to computing the curvature over the lengths of entire cells, since the ends were free and oftentimes substantially more curved than the bulk of the cell. From the processed image stacks, we extracted a mean value of

$$\mu = 0.0752/\text{frame} = 0.0376 \text{ min}^{-1}, \quad (\text{S54})$$

which yields a straightening ratio of  $\mu/\lambda = 1.81$ . A plot of  $\ln(L/L_0)$  against  $\ln(C/C_0)$  for all processed stacks, which recapitulates the fits above and the faster-than-expected decay of curvature relative to infinite processivity, is shown in Supplementary Fig. 8a.

Because the cells were released from microchamber confinement when they filled approximately 90% of the circumference of the microchamber, which has a radius of 4  $\mu\text{m}$ , we used this length information to compute the average curvature at the frame  $t = 1$  to be  $C(X, 1) = 0.18 \mu\text{m}^{-1}$ . The initial curvature of this fit is then extrapolated as  $C(X, 0) = 0.18 \exp(\mu) \approx 0.194 \mu\text{m}^{-1}$ , and since the microchamber curvature is  $C = 0.25 \mu\text{m}^{-1}$ , we extracted a snapback ratio of  $\kappa \approx 0.194/0.25 = 0.78$  (Supplementary Fig. 8b).

Repeating the foregoing analysis with a global, circle fit to the midline yields similar results. In particular, we performed a global fit to the cell by considering the circle joining the head, midpoint, and tail of each

cell, where the midpoint is determined as the point that bisects the length of the cell in the ninth-order polynomial fit. We found that

$$\lambda = 0.0425/\text{frame}, \quad \mu = 0.0877/\text{frame}, \quad (\text{S55})$$

corresponding to a straightening ratio of  $\mu/\lambda = 2.06$ . Supplementary Fig. 8a shows a time series of the curvature as computed with the global fit, which can be compared to that computed with the segmented fit. The average curvature at frame  $t = 1$  was determined again to be  $C(1) = 0.18 \mu\text{m}^{-1}$ , and extrapolating to find the initial curvature yielded  $C(0) = 0.18 \exp(\mu) \approx 0.197 \mu\text{m}^{-1}$ . Since the microchamber curvature is  $C = 0.25$ , the snapback ratio is  $\kappa \approx 0.79$ ; this is nearly identical to the value found with the segmented fit.

**Finite-element simulations with Abaqus FEA.** We used Abaqus FEA to obtain the equilibrium stress profile in the following cases:

1. Cylindrical shell under internal pressure held at one end against a mandrel and subject to a point force at the other end.
2. Closed toroidal section subject to an internal pressure.
3. Closed cylindrical shell with sinusoidally varying elastic modulus subject to an internal pressure.
4. Closed toroidal section composed of an orthotropic material subject to an internal pressure, with the anisotropy specified by engineering constants.

Abaqus input files (.inp format) were created with MATLAB, with shells being discretized uniformly into approximately 10,000 S4R elements. The shells were specified to have elastic modulus 1, Poisson ratio 0.2-0.5, radius 3 units, thickness 0.1 units, and pressures ranging from 0.00001-0.007 units unless otherwise noted. The larger values of pressure correspond to finite strains of the order of  $pr/Y \sim 0.1$ , and estimates of the material properties of *E. coli* suggest that they lie in this regime (Supplementary Table 1). The length was discretized into 300 elements and the circumference was discretized into 32 elements; varying the fineness of this discretization yielded similar results. For closed surfaces, flat endcaps were placed with a thickness of 1000 simulation units; we repeated our simulations for different thicknesses ranging from 0.1-1000 simulation units and found our reported results to be robust to this variation. For case (2), the bending parameter of the torus was varied from  $c = 0.01$  to 0.1. For case (3), 32 different element sets with sinusoidally varying elastic moduli, for which the variational parameter  $d$  ranged from 0.1 to 0.7, were assigned to elements circumferentially. For case (4), a part orientation was defined and the orthotropic material properties were specified with engineering constants. In all cases, the option of geometric nonlinearity was turned on and surface coordinate systems were specified appropriately. For all simulations, we verified that the stress profiles are identical along the bulk of the shell, excluding a small region near the endcaps.

**Discrete simulations of the growth process.** In order to provide numerical evidence for the validity of extending the limits of integration to  $\mp\infty$  in equation (S17), we simulated the growth process with MATLAB for parameter values similar to those in Supplementary Table 1 and assessed whether the straightening rate agreed with equation (S50). We initiated a set of time series describing the pole-to-pole lengths  $L(\theta)$  at discretized angles  $\theta \in [0, 2\pi]$  and nucleated a discrete number ( $\sim 30$ ) of new growth sites. The number of growth sites at each angle differed depending on both the pole-to-pole length and the differential areal strain at that angle, as prescribed by the integrand of equation (S17). We increased  $L(\theta)$  by an amount proportional to the number of growth sites at  $\theta$ . Each growth site was then translocated with an angular velocity  $M$  and randomly removed according to a Poisson process with rate  $1/\tau$ . In the continuum limit, this numerical simulation agrees with the numerical solution of the growth equation, as discussed in the Methods section of the main text. The simulation results, which are shown in Supplementary Fig. 5 and Supplementary Video 11, suggest that:

1. extending the limits of integration to  $\mp\infty$  in equation (S17) is valid as an approximation;
2. after the areal strain profile flips signs, the transient effect due to old growth sites (which were nucleated according to a different areal strain profile) is negligible for the parameter values considered.

**MreB-msfGFP fluorescence analysis methodology.** Cell boundaries were detected from phase contrast microscopy images using the MATLAB-based cell segmentation tool Morphometrics (SimTK) [23]. The cell poles and the cell centerline were identified using the MicrobeTracker package (Supplementary Figs. 9a-b) [28]. The centerline was used for a cell-internal orthogonal coordinate system, with  $X$  the contour length along the centerline. Sample points  $X_i$  were equally spaced along the contour with an interval of 0.5 pixels, and the second coordinates of these points were chosen perpendicular to the centerline.

To measure the bending-induced curvature of the cell body  $C(X)$  rather than local curvature fluctuations on the cell boundaries, we smoothed the  $x$ - and  $y$ -coordinates of the raw, extracted centerline using a Gaussian filter (with a standard deviation of 12.5 pixels) and subsequently calculated the curvature at every smoothed sample point as described. We only considered cells that do not show centerline curvatures with opposite signs, indicative of twisting, and we chose the orientation of the cell poles so that the centerline curvature is positive for every cell. The inside and outside boundaries of the cell are thus always on the left and right sides of the centerline, respectively, when observed along the cell contour.

MreB-msfGFP images were filtered with a 2D Gaussian filter (with a standard deviation of 0.5 pixels) to remove pixel noise. In analyzing MreB intensity ratio and curvature, we only considered the “central region” of the cell, which constitutes 40% of the cell length (Supplementary Fig. 9b). We therefore excluded the cell poles and also the regions that appear as straight during microscopy in two dimensions: this may, presumably, be due to cell twisting upon release from confinement and during recovery. To extract the MreB-msfGFP intensities  $I_{in/out}(X)$  on the inner and outer cell boundaries closest to the centerline point  $X$ , filtered image intensities were linearly interpolated at 5 equally spaced points within a 130 nm-long interval perpendicular to the cell centerline and centered about the inner or outer boundaries. The interpolated intensity values were averaged to yield the MreB intensity values  $I_{in/out}(X)$  on the inner and outer cell boundaries. To ensure that possible discrepancies between the boundaries identified from phase-contrast images and the physical cell boundaries did not lead to artifacts in our measurements, we checked that our analysis yields almost the same average MreB intensity ratio values for intervals as large as 300 nm (Supplementary Fig. 9c-d). MreB-msfGFP intensity values were normalized by the average over all boundary values in the region of interest (Supplementary Fig. 9b) as

$$I(X) = I_{in/out}^{raw}(X) \left( \frac{1}{2N} \sum_i (I_{in}^{raw}(X_i) + I_{out}^{raw}(X_i)) \right)^{-1}, \quad (S56)$$

where  $N$  is the number of points along the centerline region of interest. Average values were obtained by summation over all datapoints  $X_i$  in all cells. The conditional MreB intensity as a function of local centerline curvature,  $\mathcal{I}(C)$ , is the binned average of all normalized boundary intensities associated with a centerline curvature close to  $+C$  (outside boundaries) or  $-C$  (inside boundaries), reflecting the positive and negative curvature of the outer and inner cell edges, respectively.

We verified that our analysis of average curvature and average MreB intensity ratio are robust with respect to changes of the region of interest between 35% and 45% of the cell length (Supplementary Fig. 9c). Furthermore, the curves displaying the MreB intensity ratio as a function of centerline curvature do not depend on the region of interest as long as cell poles are excluded (Supplementary Fig. 9d), consistent with the idea that within experimental conditions MreB intensity ratio is dictated by centerline curvature. Using an independent method of quantifying MreB localization by partitioning the cell in half along the midline and taking the pixel average over the inner and outer bulks, we found that the population average enrichment of the inner bulk drops from 1.07 at 10 mins after release to 1.05 at 30 mins after release and that the distribution becomes markedly shifted to the left (Supplementary Fig. 10a).

Finally, we checked the population-averaged straightening ratio of 60 MreB-msfGRP fusion cells and found that it was  $\approx 1.66$ , similar to that of the wild-type cells ( $\approx 1.8$ ) used in this study (Supplementary Fig. 10b).

## Supplementary References

- [1] Amir, A., Babaeipour, F., McIntosh, D. B., Nelson, D. R. & Jun, S. Bending forces plastically deform growing bacterial cell walls. *Proc. Natl. Acad. Sci. USA* **111**, 5778–5783 (2014).
- [2] Amir, A. & van Teeffelen, S. Getting into shape: How do rod-like bacteria control their geometry? *Syst. Synth. Biol.* **8**, 227–235 (2014).
- [3] van Teeffelen, S. *et al.* The bacterial actin MreB rotates, and rotation depends on cell-wall assembly. *Proc. Natl. Acad. Sci. USA* **108**, 15822–15827 (2011).
- [4] Garner, E. C. *et al.* Coupled, circumferential motions of the cell wall synthesis machinery and MreB filaments in *B. subtilis*. *Science* **333**, 222–225 (2011).
- [5] Domínguez-Escobar, J. *et al.* Processive movement of MreB-associated cell wall biosynthetic complexes in bacteria. *Science* **333**, 225–228 (2011).
- [6] Efrati, E., Sharon, E. & Kupferman, R. The metric description of elasticity in residually stressed soft materials. *Soft Matter* **9**, 8187 (2013).
- [7] Santangelo, C. D. Buckling thin disks and ribbons with non-Euclidean metrics. *EPL* **86**, 34003 (2009).
- [8] Brazier, L. G. On the flexure of thin cylindrical shells and other “thin” sections. *Proc. R. Soc. A* **116**, 104–114 (1927).
- [9] Calladine, C. R. *Theory of Shell Structures* (Cambridge University Press, 1983).
- [10] Jordan, P. F. Stresses and deformations of the thin-walled pressurized torus. *J. Aerospace Sci.* **29**, 213–225 (1962).
- [11] Sanders, J. L. & Liepins, A. A. Toroidal membrane under internal pressure. *AIAA J.* **1**, 2105–2110 (1963).
- [12] Dean, W. R. The distortion of a curved tube due to internal pressure. *Philos. Mag.* **28**, 452–464 (1939).
- [13] Jiang, H. & Sun, S. X. Growth of curved and helical bacterial cells. *Soft Mat.* **8**, 7446 (2012).
- [14] Amir, A. & Nelson, D. R. Dislocation-mediated growth of bacterial cell walls. *Proc. Natl. Acad. Sci. USA* **109**, 9833–9838 (2012).
- [15] Amir, A., Paulose, J. & Nelson, D. R. Theory of interacting dislocations on cylinders. *Phys. Rev. E Stat. Nonlin. Soft Matter Phys.* **87**, 042314 (2013).
- [16] Sliusarenko, O., Cabeen, M. T., Wolgemuth, C. W., Jacobs-Wagner, C. & Emonet, T. Processivity of peptidoglycan synthesis provides a built-in mechanism for the robustness of straight-rod cell morphology. *Proc. Natl. Acad. Sci. USA* **107**, 10086–10091 (2010).
- [17] Yao, X., Jericho, M., Pink, D. & Beveridge, T. Thickness and elasticity of Gram-negative murein sacculi measured by atomic force microscopy. *J. Bacteriol.* **181**, 6865–6875 (1999).
- [18] Deng, Y., Sun, M. & Shaevitz, J. W. Direct measurement of cell wall stress stiffening and turgor pressure in live bacterial cells. *Phys. Rev. Lett.* **107**, 158101 (2011).
- [19] Typas, A., Banzhaf, M., Gross, C. A. & Vollmer, W. From the regulation of peptidoglycan synthesis to bacterial growth and morphology. *Nat. Rev. Microbiol.* **10**, 123–136 (2012).
- [20] Vollmer, W., Joris, B., Charlier, P. & Foster, S. Bacterial peptidoglycan (murein) hydrolases. *FEMS Microbiol. Rev.* **32**, 259–286 (2008).
- [21] Harris, L. K., Dye, N. A. & Theriot, J. A. A *Caulobacter* MreB mutant with irregular cell shape exhibits compensatory widening to maintain a preferred surface area to volume ratio. *Mol. Microbiol.* **94**, 988–1005 (2014).

- [22] Kim, S. Y., Gitai, Z., Kinkhabwala, A., Shapiro, L. & Moerner, W. E. Single molecules of the bacterial actin MreN undergo directed treadmilling motion in *Caulobacter crescentus*. *Proc. Natl. Acad. Sci. USA* **103**, 10929–10934 (2006).
- [23] Ursell, T. S. *et al.* Rod-like bacterial shape is maintained by feedback between cell curvature and cytoskeletal localization. *Proc. Natl. Acad. Sci. USA* **111**, 1025–1034 (2014).
- [24] Rojas, E., Theriot, J. A. & Huang, K. C. Response of *Escherichia coli* growth rate to osmotic shock. *Proc. Natl. Acad. Sci. USA* **111**, 7807–7812 (2014).
- [25] Pilizota, T. & Shaevitz, J. W. Fast, multiphase volume adaptation to hyperosmotic shock by *Escherichia coli*. *PLOS ONE* **7**, e35205 (2012).
- [26] Tuson, H. H. *et al.* Measuring the stiffness of bacterial cells from growth rates in hydrogels of tunable elasticity. *Mol. Microbiol.* **85**, 874–891 (2012).
- [27] Stewart, E. J., Madden, R., Paul, G. & Taddei, F. Aging and death in an organism that reproduces by morphologically symmetric division. *PLoS Biol.* **3**, e45 (2005).
- [28] Sliusarenko, O., Heinritz, J., Emonet, T. & Jacobs-Wagner, C. High-throughput, subpixel precision analysis of bacterial morphogenesis and intracellular spatio-temporal dynamics. *Mol. Microbiol.* **80**, 612–627 (2011).
- [29] Huang, K. C., Mukhopadhyay, R., Wen, B., Gitai, Z. & Wingreen, N. S. Cell shape and cell-wall organization in gram-negative bacteria. *Proc. Natl. Acad. Sci. USA* **105**, 19282–19287 (2008).
- [30] Vollmer, W., Blanot, D. & de Pedro, M. A. Peptidoglycan structure and architecture. *FEMS Microbiol. Rev.* **32**, 149–167 (2008).
- [31] Simmons, G. & Wang, H. *Single crystal elastic constants and calculated aggregate properties: a handbook* (MIT Press, 1971).
- [32] Volkmer, B. & Heinemann, M. Condition-dependent cell volume and concentration of *Escherichia coli* to facilitate data conversion for systems biology modeling. *PLoS ONE* **6**, e23126 (2011).
- [33] Bakshi, S., Siryaporn, A., Goulian, M. & Weisshaar, J. C. Superresolution imaging of ribosomes and RNA polymerase in live *Escherichia coli* cells. *Mol. Microbiol.* **85**, 21–38 (2012).
- [34] Koch, A. L. The surface stress theory for the case of *Escherichia coli*: the paradoxes of Gram-negative growth. *Res. Microbiol.* **141**, 119–130 (1990).
- [35] Cayley, D. S., Guttman, H. J. & Record, M. T. Biophysical characterization of changes in amounts and activity of *Escherichia coli* cell and compartment water and turgor pressure in response to osmotic stress. *Biophys. J.* **78**, 1748–1764 (2000).
- [36] Dmitriev, B. A. *et al.* Tertiary structure of bacterial murein: the scaffold model. *J. Bacteriol.* **185**, 3458–3468 (2003).

## Supplementary Tables

| Quantity                               | Symbol            | Value                                            | Source                                                                |
|----------------------------------------|-------------------|--------------------------------------------------|-----------------------------------------------------------------------|
| Material parameters                    |                   |                                                  |                                                                       |
| Cell wall elastic modulus (3D)         | $E$               | 20-30 MPa                                        | [1, 17, 18]                                                           |
| Cell wall thickness                    | $h$               | 3 nm                                             | [29, 30]                                                              |
| Cell wall elastic modulus (2D)         | $Y$               | 0.06-0.09 N/m                                    | $Y = Eh$                                                              |
| Cell wall Poisson ratio                | $\nu$             | 0.16-0.30                                        | [17, 31]                                                              |
| Cell radius                            | $r$               | 0.5 $\mu\text{m}$                                | experiment, [32, 33]                                                  |
| Turgor pressure                        | $p$               | 0.3-2 atm                                        | [18, 34, 35]                                                          |
| Dimensionless pressure                 | $\eta$            | 0.16-1.11                                        | $\eta = pr/Y$                                                         |
| MreB persistence time                  | $\tau$            | 5 min                                            | [23]                                                                  |
| MreB spot velocity                     | $v$               | 5 nm/s                                           | [3, 21, 22]                                                           |
| MreB angular velocity                  | $M$               | 0.01 rad/s                                       | $M = v/r$                                                             |
| MreB processivity                      | $M\tau$           | 3 rad                                            | extracted                                                             |
| Straightening parameters               |                   |                                                  |                                                                       |
| Microchamber radius                    | $R_{\text{curv}}$ | 4 $\mu\text{m}$                                  | experiment                                                            |
| Microchamber bending parameter         | $B^0$             | 0.125                                            | $B^0 = r/R_{\text{curv}}$                                             |
| Snapback ratio                         | $\kappa$          | $0.78 \pm 0.09$                                  | extracted                                                             |
| Steady-state differential growth       | $c^0$             | $0.098 \pm 0.011$                                | $\kappa = c^0/B^0$                                                    |
| Peptidoglycan insertion width          | $L_0$             | 1.1 nm                                           | [36]                                                                  |
| Peptidoglycan turnover rate            | $f_t$             | 0.40                                             | [19, 20]                                                              |
| Constant net growth initiation rate    | $k$               | $13 \mu\text{m}^{-2} \cdot \text{min}^{-1}$      | $k = \frac{\lambda(1+\lambda\tau)}{M\tau L_0 r}$                      |
| Constant new growth initiation rate    | $k_{\text{new}}$  | $21 \mu\text{m}^{-2} \cdot \text{min}^{-1}$      | $k_{\text{new}} = \frac{k}{1-f_t}$                                    |
| Constant degradation rate              | $k_{\text{deg}}$  | $8 \mu\text{m}^{-2} \cdot \text{min}^{-1}$       | $k_{\text{deg}} = \frac{f_t k}{1-f_t}$                                |
| Areal strain-growth coupling parameter | $\alpha$          | $200-400 \mu\text{m}^{-2} \cdot \text{min}^{-1}$ | $\alpha \approx \frac{\kappa M \lambda \tau}{L_0 r \xi_0 (1-\kappa)}$ |
| Doubling time                          | $t_d$             | 33 min                                           | extracted                                                             |
| Growth rate                            | $\lambda$         | 0.0208-0.0213 $\text{min}^{-1}$                  | extracted                                                             |
| Straightening rate                     | $\mu$             | 0.0376-0.0439 $\text{min}^{-1}$                  | extracted                                                             |

Supplementary Table 1: Variables used (or calculated) in the paper and their numerical values.



|                                                    |             | Phase 1                | Phase 2                |                         |
|----------------------------------------------------|-------------|------------------------|------------------------|-------------------------|
| Measurement                                        | Temperature | after 2 doubling times | 5 min after extraction | 30 min after extraction |
| Curvature ( $\mu\text{m}^{-1}$ )                   | 30°C        | 0.26                   | 0.24                   | no data                 |
|                                                    | 37°C        | 0.271<br>SD = 0.018    | 0.25<br>SD = 0.03      | 0.216<br>SD = 0.066     |
| MreB intensity ratio between inner and outer edges | 30°C        | 1.05                   | 1.16                   | no data                 |
|                                                    | 37°C        | 1.07<br>SD = 0.019     | 1.103<br>SD = 0.02     | 1.052<br>SD = 0.002     |

Supplementary Table 2: Mean cell centerline curvature and MreB intensity ratios of the MreB-msfGFP fusion strain at different temperatures inside confinement, 5 min after extraction, and 30 min after recovery. The standard deviation values (SD) are acquired from the repetitions of the same experiment. Measurements were obtained for 17 cells in Phase 1 and 20 cells 5 min after release at 30°C, and 119 cells in Phase 1, 132 cells 5 min after release, and 32 cells 30 min after release at 37°C.

## Supplementary Videos

Supplementary Videos 1–10: **Straightening dynamics of single *E. coli* cells.** Supplementary Videos 1 to 10 show individual, filamentous *E. coli* cells recovering their native rod shapes as they grow after release from toroidal microchambers. The time between frames is 2 minutes, the time lapses cover a period of about 40 minutes, and the field of view is approximately 40  $\mu\text{m}$  wide.

Supplementary Video 11: **Numerical simulation of the growth process.** Supplementary Video 11 shows numerical simulations in (1) the case of zero processivity; (2) the case of infinite processivity; and (3) the case of a self-consistent areal-strain coupling that results in a constant differential growth in Phase 1 and straightening in Phase 2. The simulation methodology is detailed in the Supplementary Methods.

## Supplementary Figures

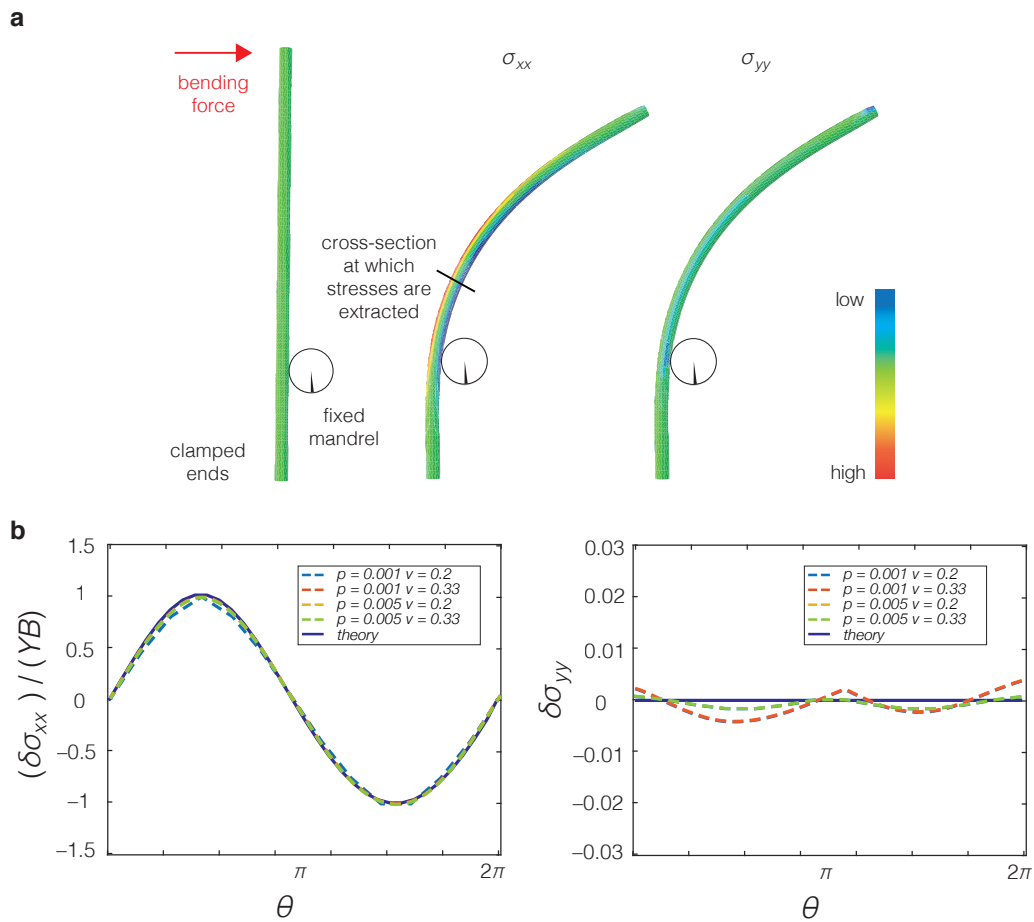

Supplementary Figure 1: **Stress profiles of pressurized cylindrical shells subject to bending moments.** **a**, Abaqus FEA simulations of a pressurized cylindrical shell subjected to a bending force against a fixed mandrel. **b**, Plots of the stress resultants for typical cross-sections indicated in **a** for varying values of  $p$  and  $\nu$ . The remaining simulation parameters are discussed in the Supplementary Methods. The theoretical prediction agrees with the simulated stress profiles. We interpret the small variations in the simulated  $\sigma_{yy}$  profiles to arise from a small eccentricity induced by bending, which is quantitatively consistent with equation (S8) (not shown).

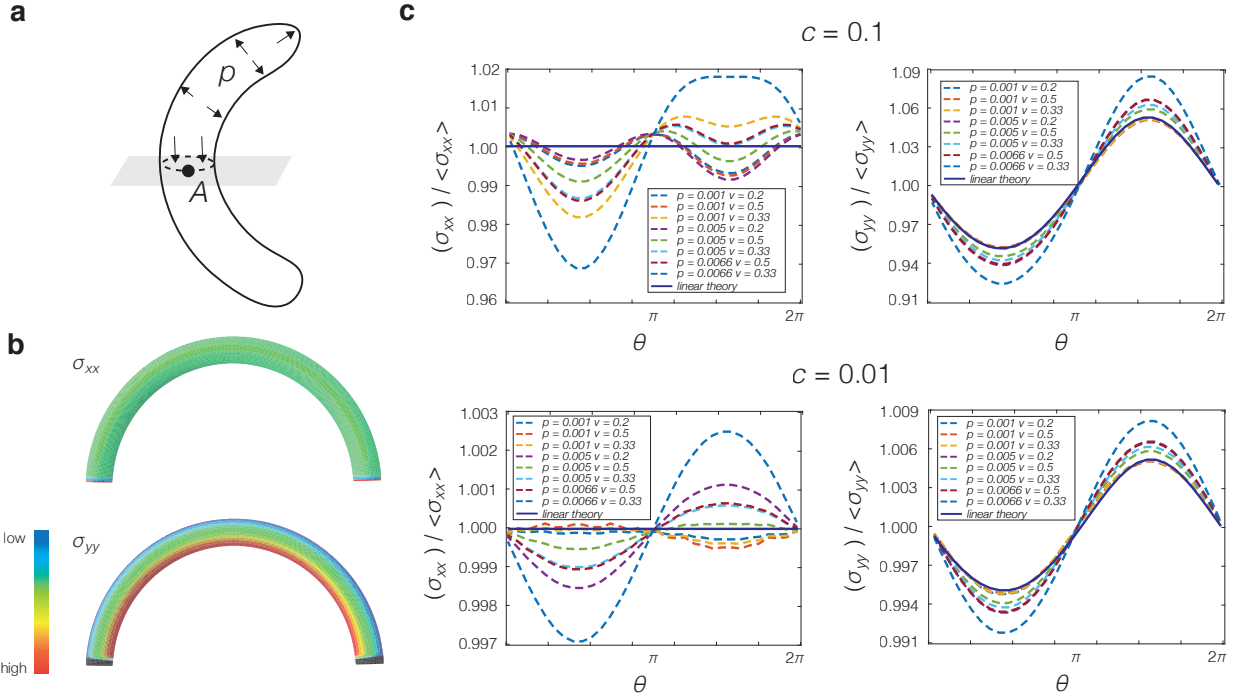

Supplementary Figure 2: **Stress profiles of closed toroidal shells subject to internal pressure.** **a**, A toroidal section with a circular cross-section at equilibrium cannot have a nonvanishing torque due to pressure. **b**, Abaqus FEA simulations for the equilibrium of an initially circular toroidal segment subject to internal pressure, where the axial and circumferential stress resultants  $\sigma_{xx}$  and  $\sigma_{yy}$  are displayed. Here  $pr/Y = 0.03$ ,  $\nu = 0.2$ , and the differential growth parameter is  $c = 0.1$ . The remaining simulation parameters are discussed in the Supplementary Methods. **c**, Plots of the normalized stress resultants  $\sigma_{xx}/\langle\sigma_{xx}\rangle$  and  $\sigma_{yy}/\langle\sigma_{yy}\rangle$  as functions of the azimuthal coordinate  $\theta$ , for  $c = 0.01$  and  $c = 0.1$ . The remaining simulation parameters are again discussed in the Supplementary Methods. A variational component in  $\sigma_{xx}$ , which is small compared to the variational component in  $\sigma_{yy}$ , arises for large strains on the order of 0.1, and is generally non-sinusoidal. Nevertheless, the stress resultants remain well-approximated by the linear theory result for a pressurized torus of circular cross-section.

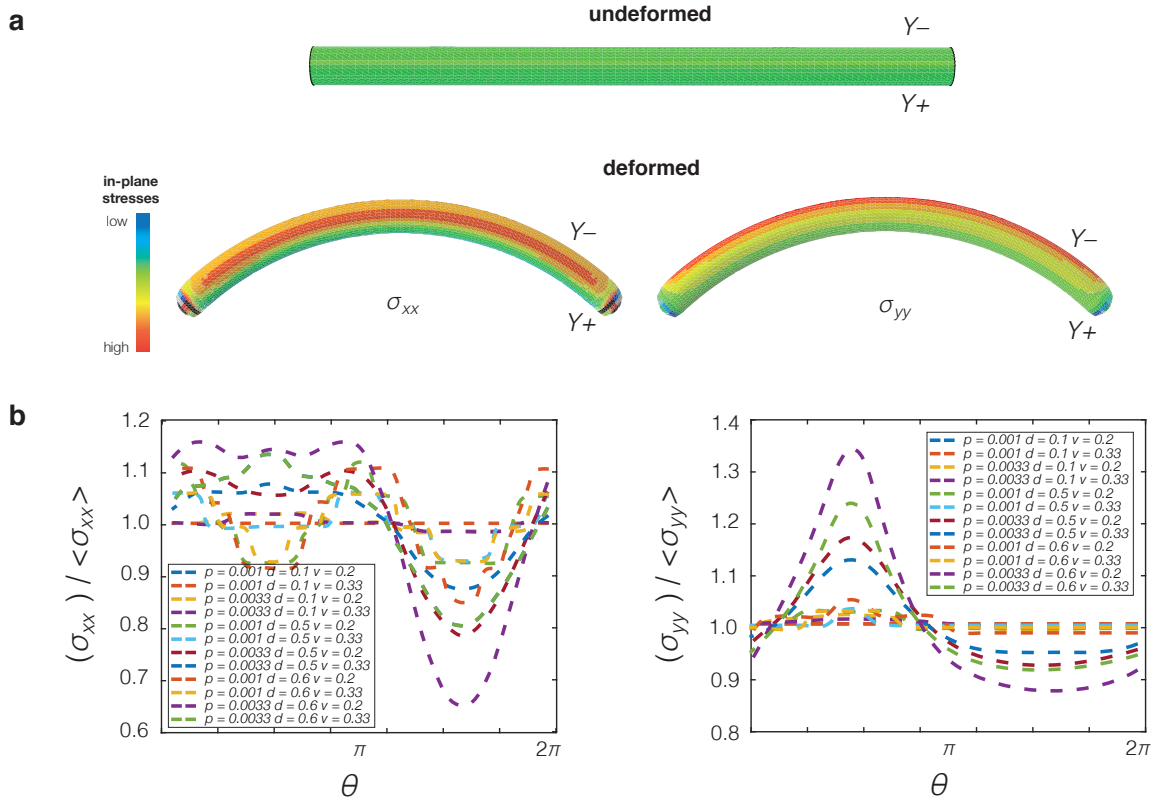

Supplementary Figure 3: **Finite-element simulations of shells with varying elastic moduli.** **a**, Abaqus FEA simulations of a capped, pressurized cylindrical shell with a sinusoidally varying elastic modulus of the form  $Y(\theta) = Y(1 + d \sin \theta)$ . Here  $pr/Y \approx 0.1$ ,  $\nu = 0.2$ , and the variational parameter  $d = 0.6$ . The remaining simulation parameters are detailed in the Supplementary Methods. Note that, in the deformed state, both  $\sigma_{xx}$  and  $\sigma_{yy}$  are larger on the outer edge but generally exhibit complex behavior. **b**, A plot of the normalized stress resultants  $\sigma_{xx}/\langle\sigma_{xx}\rangle$  and  $\sigma_{yy}/\langle\sigma_{yy}\rangle$  for a range of  $p$ ,  $d$ , and  $\nu$ , with the remaining simulation parameters as discussed in the Supplementary Methods.

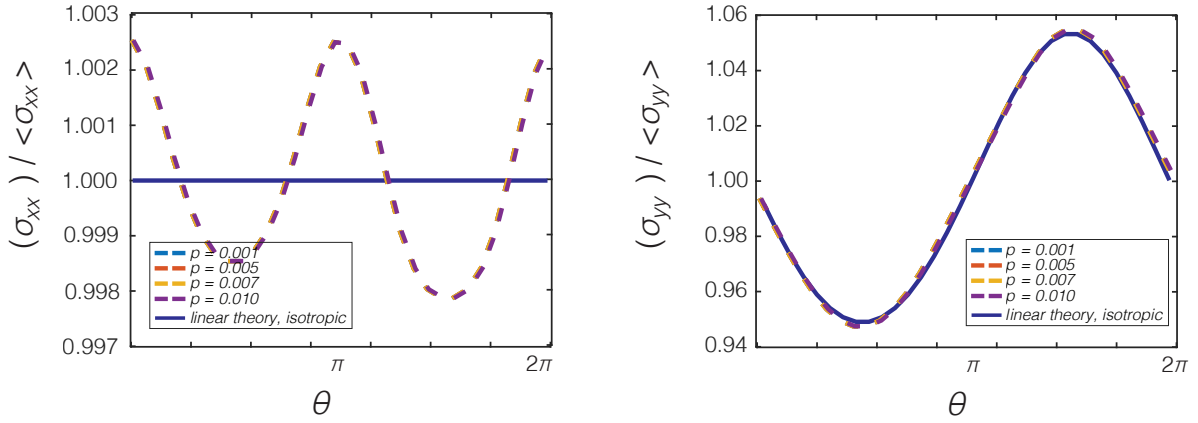

Supplementary Figure 4: **Finite-element simulations of shells with anisotropic material properties.** A plot of the normalized stress resultants  $\sigma_{xx}/\langle \sigma_{xx} \rangle$  and  $\sigma_{yy}/\langle \sigma_{yy} \rangle$  corresponding to a capped, pressurized toroidal section for varying  $p$  and orthotropic material properties specified by engineering constants. Here  $r = 3$ ,  $h = 0.1$ , the axial and circumferential elastic moduli  $E_x = E_z = 1$  and  $E_y = 2$ , the Poisson ratios  $\nu_{xy} = \nu_{xz} = \nu_{yz} = 0.33$ , and the shear moduli  $G_{xy} = G_{xz} = G_{yz} = 1$ .

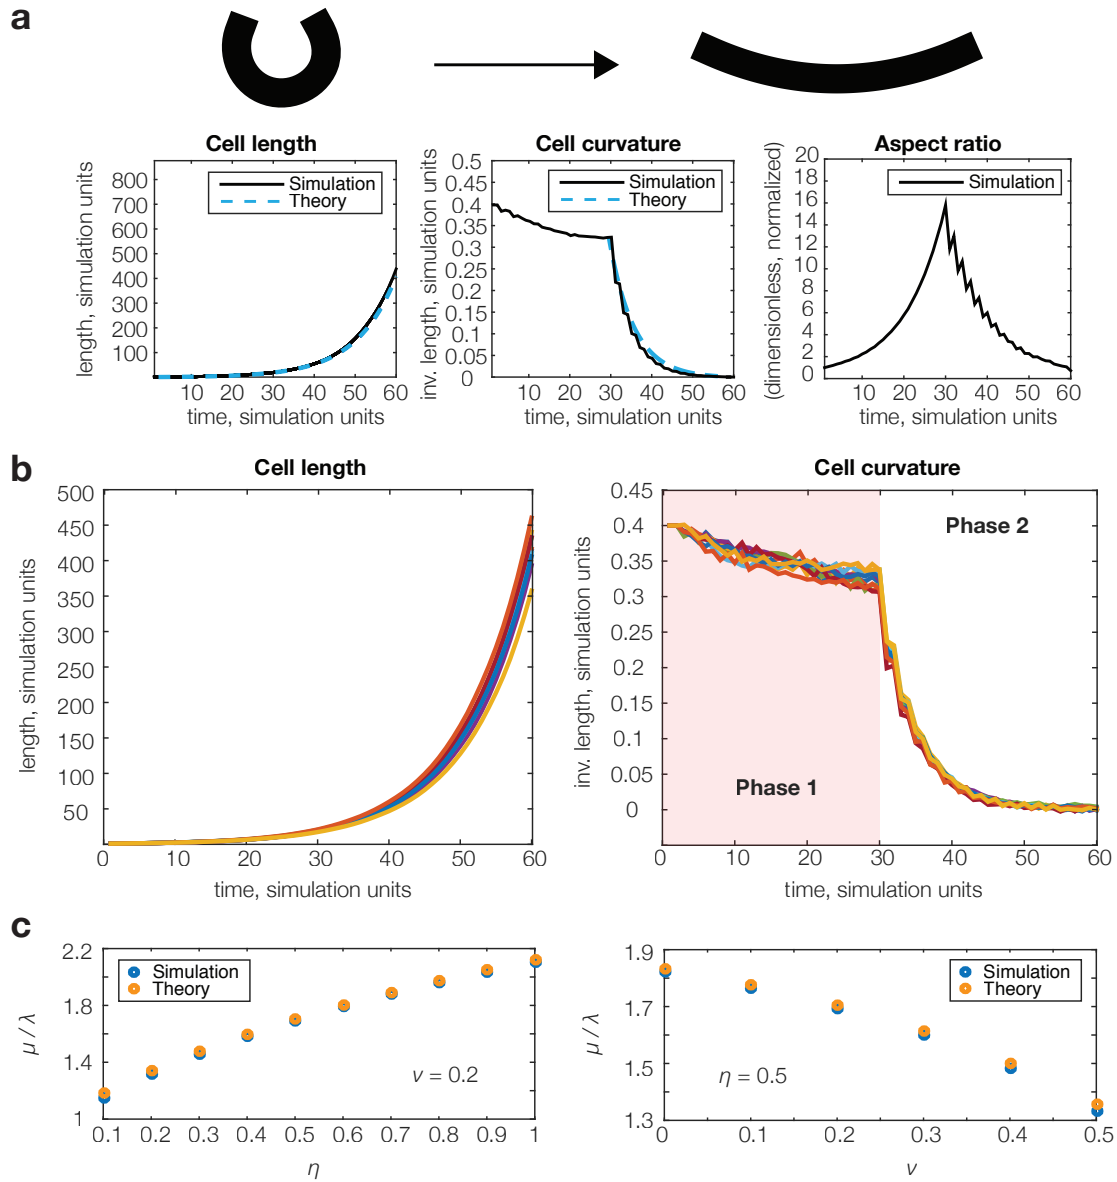

Supplementary Figure 5: **Numerical simulation of the growth process.** **a**, Simulation results for parameter values faithful to *E. coli*, as summarized in Supplementary Table 1 and the Supplementary Methods, except that we have set  $c^0 = 0.35$  to emphasize the curvature decay in the associated Supplementary Video 11. By coupling growth to areal strains, the cell grows at a steady-state value of the differential growth parameter for  $t < 30$  and straightens for  $t > 30$ . See Supplementary Video 11 for an animation of the growth process. **b**, Different simulations of **a**. Although the discrete nature of the initiation and growth process may introduce variations in cell length and curvature, these simulations suggest a negligible transient effect due to old growth sites once the areal strain profile has flipped. **c**, Average simulated straightening rates with the same parameters as **a**, except  $\eta$  and  $\nu$  are varied. The simulation results agree with the theoretical prediction for a range of  $\eta$  and  $\nu$ .

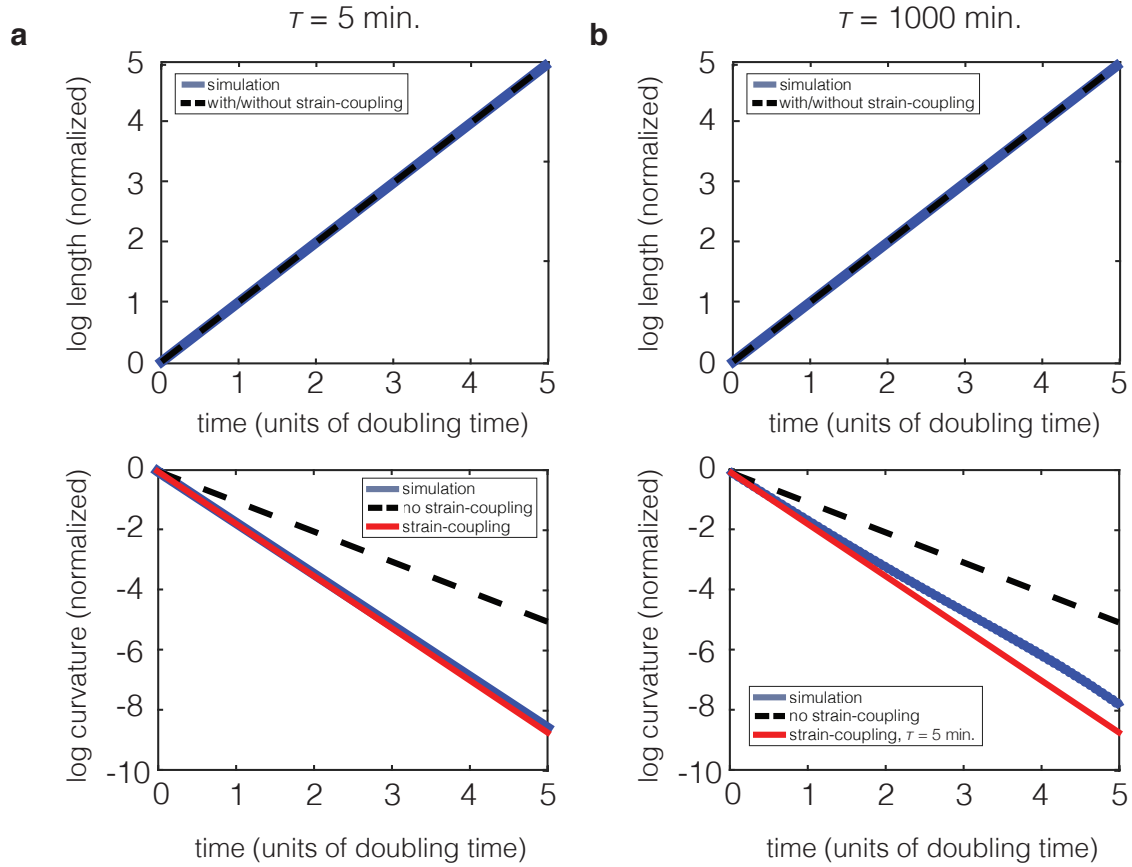

Supplementary Figure 6: **Numerical solutions of the growth equation.** **a**, A numerical solution of equation (S23) in the regime  $\tau : M\tau \gg 1 \gg \mu\tau > \lambda\tau$ , where all parameters are set to values in the ranges specified by Supplementary Table 1. The length along the midline of the cell grows exponentially with rate  $\lambda$ . As expected, the curvature decays exponentially with rate  $\lambda$  in the case of infinite processivity with no areal strain-coupling (dashed black line), but faster in the case where there is strain-coupling (solid blue line). The solid red line is the curve  $-\mu t$ , with  $\mu$  given by equation (S50), which agrees with the numerical result. **b**, A numerical solution of equation (S23) in the regime  $\tau : M\tau \gg \mu\tau > \lambda\tau > 1$ , where  $M = 0.6$  rad/min and  $\tau = 1000$  min. The remaining parameter values are set according to Supplementary Table 1. This corresponds to the case where MreB may persist longer than the doubling time of the cell, as discussed in Supplementary Note 2. Although small amplitude oscillations appear (inset), the curvature decays at an average rate that is higher than the prediction of infinite processivity, but lower than the case of an intermediate processivity with strain-coupling (**a**).



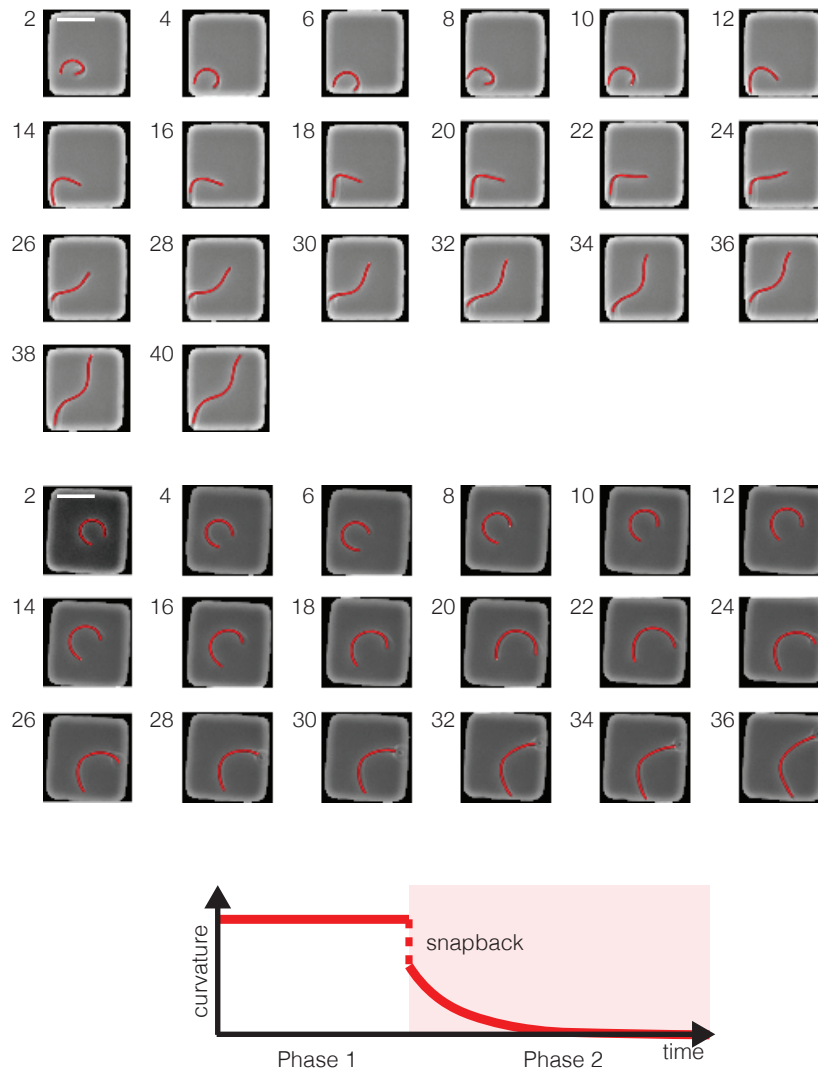

Supplementary Figure 7: *CurvatureTracker* results. Two examples of single-cell straightening events, corresponding to an exponential decay of curvature, tracked by *CurvatureTracker* out of a sample size of 60. Red curves indicate ninth-degree parametric polynomial fits and are overlaid on top of the cell. The time between frames is 2 minutes, as indicated on the upper-left corner of each frame, and the field of view is approximately 40  $\mu\text{m}$  wide. These image sequences correspond to the straightening behavior observed in Phase 2 of our experiments (bottom). Scale bars denote 20  $\mu\text{m}$ .

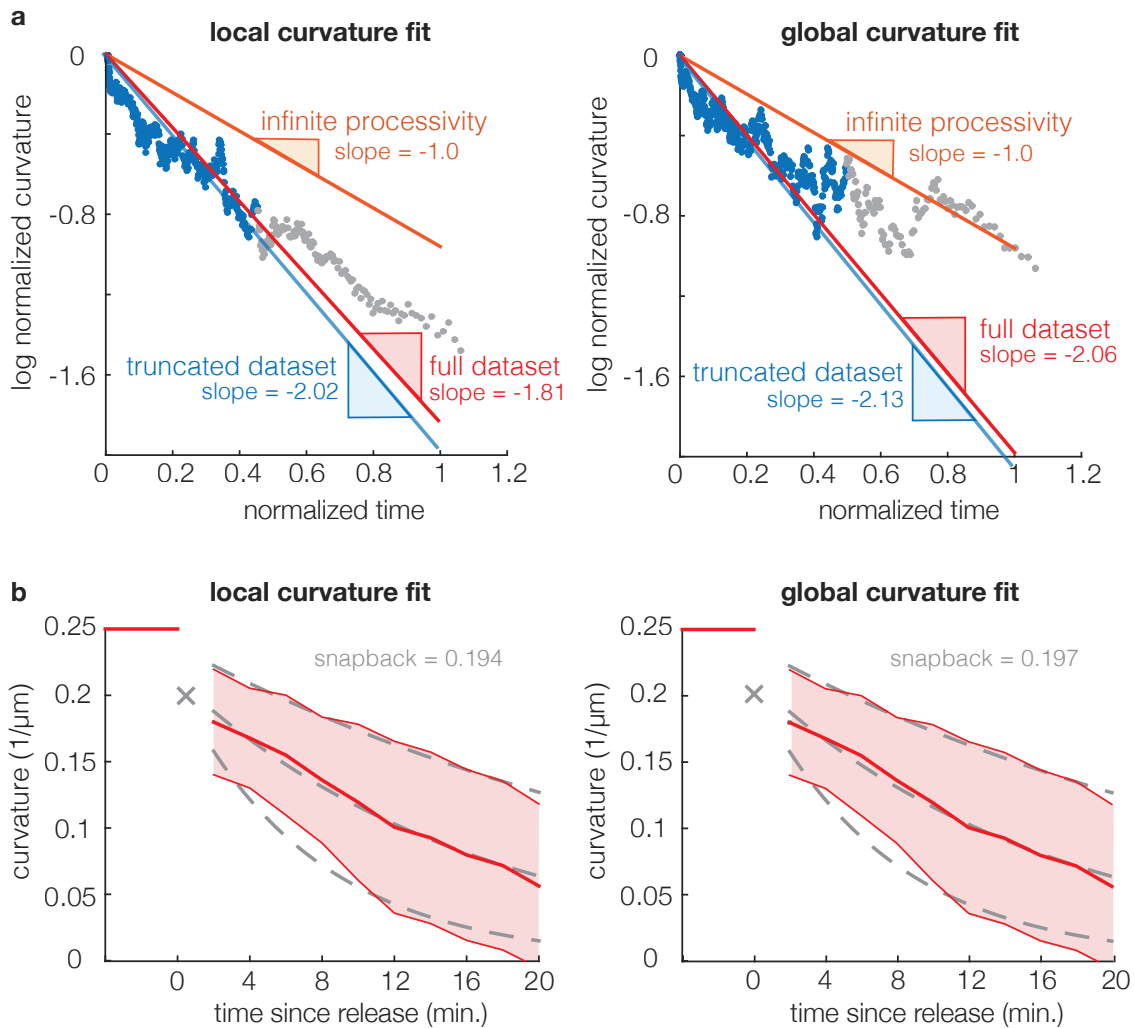

Supplementary Figure 8: **Image analysis results.** **a**, Aggregated straightening data from all 60 cells, where both a local, segmented fit (left) and a global fit (right) to the cell curvature were used. Unlike Fig. 4c of the main text, a moving average filter was not applied. The time is plotted in units of  $1/\lambda$ , corresponding to the doubling time of the cell divided by  $\ln(2)$ . The log normalized curvature is defined as  $\ln(C(t)/C(t = 2 \text{ min}))$ , where  $C(t)$  is the curvature of the cell at time  $t$ . The gray data points were discarded in considering a truncated fit, as discussed in the Supplementary Methods; because the blue data points are significantly denser, the straightening rates of the truncated datasets lie within only 5% of the full dataset values for both fits. **b**, Plots of average cell curvature against time for both fits. Extrapolating the population-averaged cell curvature (thick red curve) via an exponential fit to  $t = 0$  allows us to infer the snapback ratios. Shaded areas denote values within one standard deviation of the population means. The gray dashed lines denote exponential fits to values which are one standard deviation away from the population average.

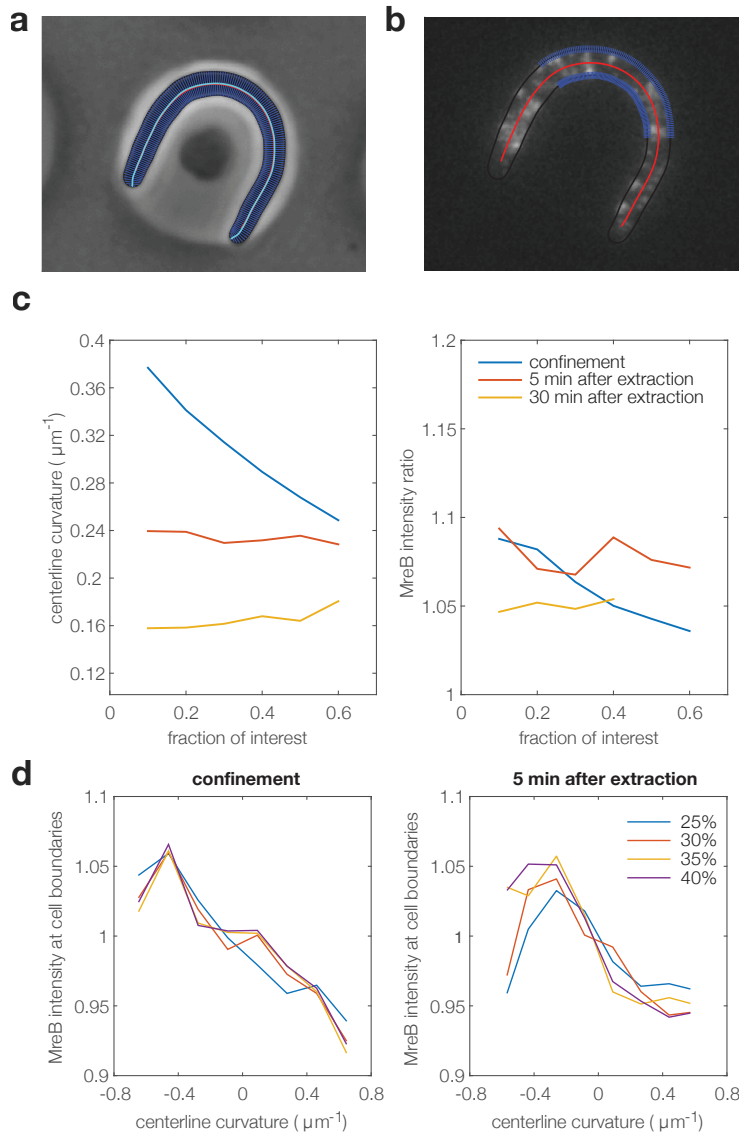

Supplementary Figure 9: **MreB-msfGFP fluorescence analysis methodology and sensitivity analysis.** **a**, For MreB-msfGFP measurements, cell contours are obtained from phase contrast images and an cell-internal coordinate system is developed based on the cell centerline (cell boundaries in black, smooth centerline in red, raw centerline in cyan, lines perpendicular to raw centerline in blue). **b**, The MreB-msfGFP signal as a function of contour length  $I_{in/out}(X)$  is obtained by linear interpolation and averaging along an interval of points perpendicular to the cell boundaries along the central 40% of the cell (central region is shown in light blue together with cell boundaries and smooth centerline). **c**, Average cell curvature is robust with respect to changes of the cellular regions of interest considered for analysis both after extraction and during recovery. Inside the microchambers, the curvature and MreB intensity ratio drop as a function of the fraction of total cell length considered, consistent with the observation that the ends of cells are often straighter than the central region. Each curve in **c** and **d** was generated by measurements from between 20-40 cells from at least two replicate experiments, as detailed in the Methods section of the main text. **d**, MreB intensity ratio as a function of local curvature is unaffected by the size of the region of interest considered for analysis in microchambers, after extraction, and during recovery. Negative and positive curvatures correspond to inner and outer edges, respectively.

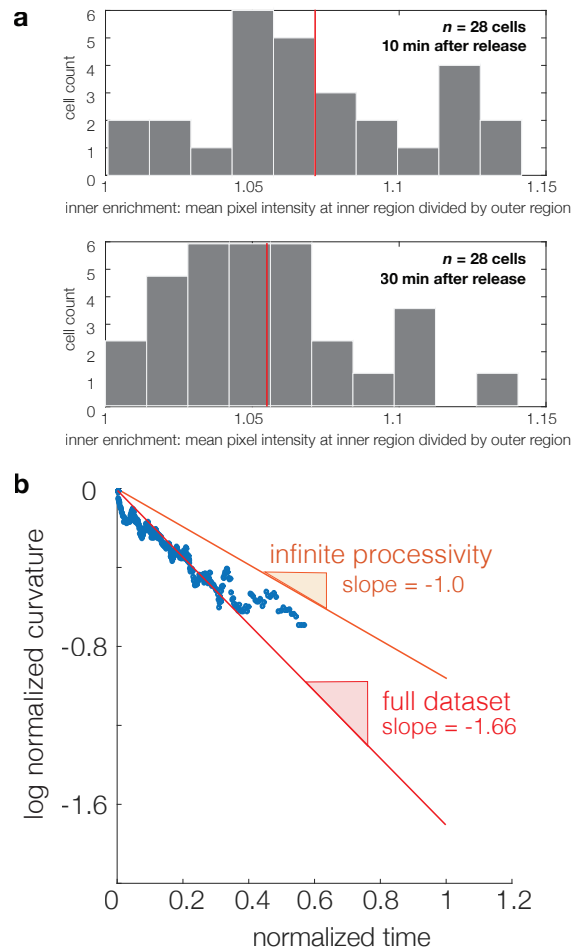

Supplementary Figure 10: **Checking the MreB-msfGFP fluorescence analysis.** **a**, Distributions of the inner MreB enrichment using a simple bulk pixel averaging method, at two different times in Phase 2, which are representative of three replicate experiments. The red line denotes the mean. **b**, Population-averaged straightening statistics of the MreB-msfGFP fusion, for a local curvature fit on 60 cells as discussed in the Supplementary Methods. We find a straightening ratio  $\langle\mu\rangle/\langle\lambda\rangle \approx 1.7$ , approximately that of the wild-type strain ( $\langle\mu\rangle/\langle\lambda\rangle \approx 1.8$ ) used in this study (Fig. 4c of the main text).

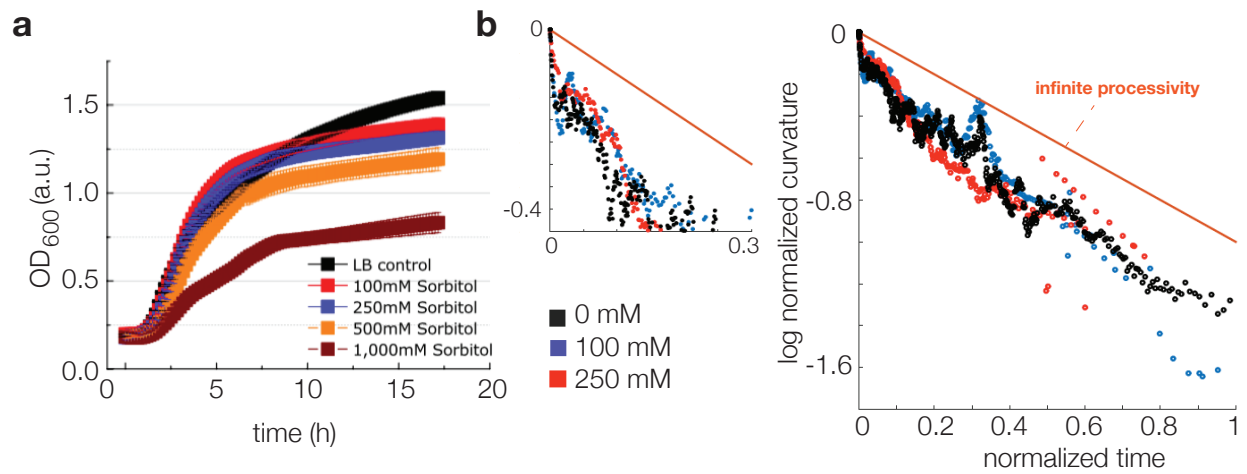

Supplementary Figure 11: **Effect of hyperosmotic shock on straightening.** **a**, Growth curves of *E. coli* bulk culture subjected to varying degrees of hyperosmotic shock, which are representative of two independent measurements and three repetitions each. **b**, A straightening plot of the hyperosmotically shocked cells for a local curvature fit (60 cells for 0 mM, 22 cells for 100 mM and 27 cells for 250 mM), corresponding to Fig. 4c in the main text.
